# Supplementary material for: Stackable molecular chairs
Source: Royal Society of Chemistry journal article supplement (doi:10.1039/c9cc01664c), 2019-01-01
Supplement: c9cc01664c1.pdf [file c9cc01664c1.pdf]

## **Stackable Molecular Chairs**

Han Xie, Lei Zhiqun, Radoslav Z. Pavlović, Judith Gallucci and Jovica D. Badjić\*

Department of Chemistry and Biochemistry, The Ohio State University, 100 West 18th Avenue,  
Columbus, OH 43210

E-mail: badjic.1@osu.edu

# **SUPPORTING INFORMATION**

## Table of Contents

|                                  |         |
|----------------------------------|---------|
| General Information.....         | S3      |
| Synthetic Procedures.....        | S4-S10  |
| NMR and ESI-MS Experiments ..... | S11-S31 |
| Computational Studies.....       | S32-S36 |
| X-Ray Diffraction Data.....      | S37-S38 |

## General Information

All chemicals were purchased from commercial sources and used as received unless stated otherwise. All solvents were dried prior to use according to standard literature procedures. Chromatographic purifications were performed with silica gel 60 (SiO<sub>2</sub>, Sorbent Technologies 40-75  $\mu$ m, 200 x 400 mesh). Thin-layer chromatography (TLC) was performed on silica-gel plate w/UV254 (200  $\mu$ m). For NMR studies, we used class B glass NMR tubes (Wilmad Lab Glass). NMR experiments were performed with Bruker 400, 600, 700 and 850 MHz spectrometers. Chemical shifts are expressed in parts per million ( $\delta$ , ppm) while coupling constant values ( $J$ ) are given in Hertz (Hz). Residual solvent resonances were used as internal standards: for <sup>1</sup>H NMR spectra CDCl<sub>3</sub> = 7.26 ppm, (CD<sub>3</sub>)<sub>2</sub>SO = 2.50 ppm, CD<sub>3</sub>OD = 3.31 ppm and D<sub>2</sub>O = 4.79 ppm while for <sup>13</sup>C NMR spectra CDCl<sub>3</sub> = 77.0 ppm, (CD<sub>3</sub>)<sub>2</sub>SO = 41.23 ppm and CD<sub>3</sub>OD = 49.00 ppm. Deuterated solvents CD<sub>3</sub>OD, CDCl<sub>3</sub>, D<sub>2</sub>O and (CD<sub>3</sub>)<sub>2</sub>SO were purchased from Cambridge Isotope Laboratories. HRMS data were obtained on a Bruker-ESI TOF instrument. The calibrations of pH were completed with HI 2210 pH meter.

## Synthetic Procedures

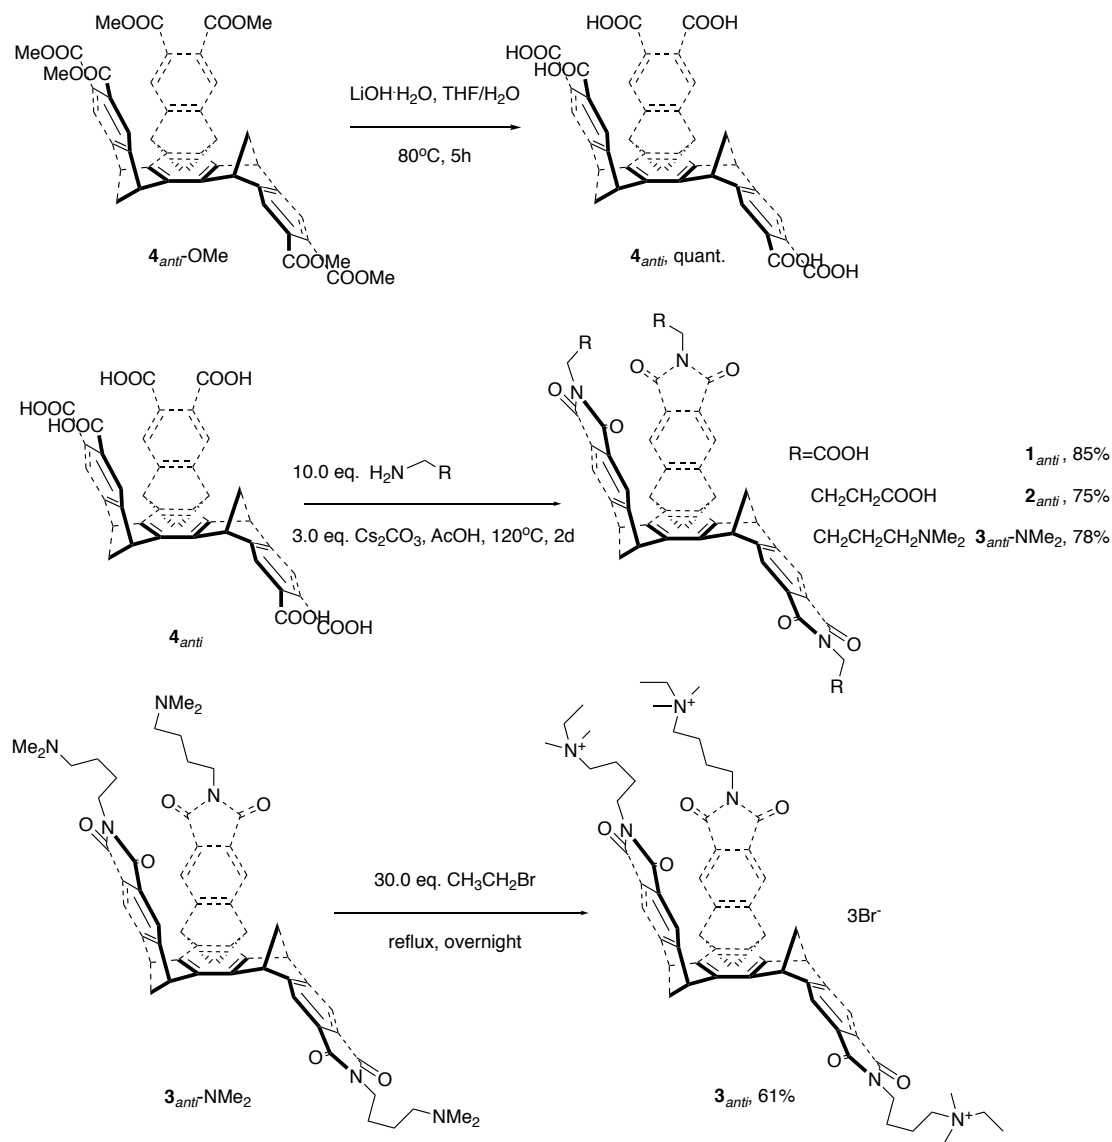

**Scheme S1.** Synthetic scheme describing the preparation of **1–3<sub>anti</sub>** from **4<sub>anti</sub>**. (Top) Compound **4<sub>anti</sub>** was obtained by base-promoted hydrolysis from hexaester **4<sub>anti</sub>-OMe** (for preparing this compound, see: Border, S. E.; Pavlovic, R. Z.; Lei, Z. Q.; Badjic, J. D., *J. Am. Chem. Soc.* **2017**, *139*, 18496-18499). (Bottom) For obtaining **3<sub>anti</sub>**, we alkylated the condensation product **3<sub>anti</sub>-NMe<sub>2</sub>** with ethyl bromide.



**Compound 4<sub>anti</sub>:** Hexaester 4<sub>anti</sub>-OMe (252 mg, 0.328 mmol) and LiOH · H<sub>2</sub>O (421 mg, 9.8 mmol) were dissolved in 1:1 THF/H<sub>2</sub>O (30 mL) and the solution was brought to 80 °C for 5h; for obtaining 4<sub>anti</sub>-OMe, see: Border, S. E.; Pavlovic, R. Z.; Lei, Z. Q.; Badjic, J. D., *J. Am. Chem. Soc.* **2017**, *139*, 18496-18499. After cooling down the reaction mixture to room temperature, THF was removed under reduced pressure. To the remaining solvent, 10 mL of deionized water was added to dilute the mixture and 1 mL of 0.5 M HCl was added to cause the formation of white precipitate. After centrifugation, decantation and washing of the precipitate with diluted HCl (pH = 3), the remaining wet solid was lyophilized to give 4<sub>anti</sub> as a white powder in practically quantitative yield (220 mg). <sup>1</sup>H NMR (850 MHz, CD<sub>3</sub>SOCD<sub>3</sub>): δ (ppm) = 12.85 (broad, COOH), 7.63 (s, 2H), 7.57 (s, 2H), 7.54 (s, 2H), 4.61 (s, 2H), 4.61 (s, 2H), 4.59 (s, 2H), 2.39-2.24 (AB quartet, 4H, *J* = 7.9 Hz), 2.35-2.06 (AB quartet, 2H, *J* = 7.1 Hz). <sup>13</sup>C NMR (213 MHz, CD<sub>3</sub>SOCD<sub>3</sub>): δ (ppm) = 169.29, 169.15, 169.00, 153.56, 153.42, 153.38, 138.66, 138.49, 138.38, 130.92, 130.77, 130.44, 121.80, 121.71, 121.53, 65.25, 65.14, 48.36, 48.28, 48.25. HRMS (ESI): *m/z* calcd for C<sub>39</sub>H<sub>23</sub>O<sub>12</sub><sup>-</sup> [M-H]<sup>-</sup>: 683.1195; found: 683.1229

**Compounds 1<sub>anti</sub>/2<sub>anti</sub>:** A solution of 4<sub>anti</sub> (10 mg, 0.015 mmol), Cs<sub>2</sub>CO<sub>3</sub> (49 mg, 0.15 mmol) and amino acids **5** or **6** (12 or 17 mg, 0.16 mmol) in 1 mL of glacial acetic acid was stirred at 120 °C for 2d. After cooling the reaction mixture to room temperature, the solvent was removed under reduced pressure. The solid residue was rinsed with 3 x 5 mL of diluted HCl (pH = 3) to give 1<sub>anti</sub> or 2<sub>anti</sub> as an off-white powder after the lyophilization. 1<sub>anti</sub> was recrystallized from CH<sub>3</sub>OH:CH<sub>2</sub>Cl<sub>2</sub> = 1:5 after vapor diffusion of Et<sub>2</sub>O (10.2 mg, 85% yield). 2<sub>anti</sub> was recrystallized from CH<sub>2</sub>Cl<sub>2</sub> after vapor diffusion of hexanes (10.3 mg, 75% yield). **Compound 1<sub>anti</sub>:** <sup>1</sup>H NMR (700 MHz, CD<sub>3</sub>SOCD<sub>3</sub>): δ (ppm) = 13.15 (broad, COOH), 7.93 (s, 2H), 7.90 (s, 2H), 7.81 (s, 2H), 4.76 (s, 2H), 4.75 (s, 2H), 4.71 (s, 2H), 4.27 (s, 2H), 4.20 (s, 4H), 2.48-2.35 (AB quartet, 4H, *J* = 8.3 Hz), 2.46-2.15 (AB quartet, 2H, *J* = 8.4 Hz). <sup>13</sup>C NMR (175 MHz, CD<sub>3</sub>SOCD<sub>3</sub>): δ (ppm) = 169.42, 169.34, 167.89, 167.80, 167.74, 158.68, 158.61, 158.50, 138.76, 138.64, 138.42, 130.21, 130.15, 117.03, 116.95, 116.90, 65.56, 65.19, 48.80, 48.68, 48.66, 39.31, 39.20. HRMS (ESI): *m/z* calcd for C<sub>45</sub>H<sub>26</sub>N<sub>3</sub>O<sub>12</sub><sup>-</sup> [M-H]<sup>-</sup>: 800.1516, found: 800.1538. **Compound 2<sub>anti</sub>:** <sup>1</sup>H NMR (400 MHz, CD<sub>3</sub>SOCD<sub>3</sub>): δ (ppm) 12.00 (broad, COOH), 7.85 (s, 2H), 7.82 (s, 2H), 7.74 (s, 2H), 4.74 (s, 2H), 4.73 (s, 2H), 4.69 (s, 2H), 3.58-3.55 (t, 2H, *J* = 6.6 Hz), 3.51-3.47 (t, 4H, *J* = 6.8 Hz), 2.48-2.29 (AB quartet, 4H, *J* = 8.3 Hz), 2.45-2.07 (AB quartet, 2H, *J* = 8.4 Hz), 2.24-

2.19 (m, 6H), 1.78-1.71 (m, 6H).  $^{13}\text{C}$  NMR (175 MHz,  $\text{CD}_3\text{SOCD}_3$ ):  $\delta$  (ppm) = 174.31, 174.27, 168.58, 168.48, 158.04, 157.94, 138.72, 138.60, 138.42, 130.40, 130.36, 130.29, 116.69, 116.58, 65.57, 65.21, 48.77, 48.61, 48.58, 37.26, 37.18, 31.39, 31.33, 23.86, 23.84. HRMS (ESI):  $m/z$  calcd for  $\text{C}_{51}\text{H}_{39}\text{N}_3\text{NaO}_{12}$   $[\text{M}+\text{Na}]^+$ : 908.2431; found: 908.2457

**Compound 3<sub>anti</sub>-NMe<sub>2</sub>**: A solution of **4<sub>anti</sub>** (20 mg, 0.029 mmol),  $\text{Cs}_2\text{CO}_3$  (98 mg, 0.29 mmol), *N,N*-dimethylbutane-1,4-diamine **7** (34 mg, 0.29 mmol) in 1 mL glacial acetic acid was stirred at 120 °C for 2d. After cooling the reaction mixture to room temperature, the solvent was removed under reduced pressure. The solid residue was dissolved in 5 mL of water after which 0.1M HCl was added to adjust pH to 3. The aqueous layer was washed with ethyl acetate (3 x 4 mL), followed by changing its pH to 8 with saturated  $\text{NaHCO}_3$ . After the product was extracted with  $\text{CH}_2\text{Cl}_2$  (5 x 4 mL), the organic layer was dried over  $\text{Na}_2\text{SO}_4$  and the solvent was removed under vacuum to give **3<sub>anti</sub>-NMe<sub>2</sub>** as a yellow oil (21 mg, 78%).  $^1\text{H}$  NMR (700 MHz,  $\text{CDCl}_3$ ):  $\delta$  (ppm) = 7.73 (s, 2H), 7.65 (s, 2H), 7.62 (s, 2H), 4.50 (s, 2H), 4.46 (s, 2H), 4.45 (s, 2H), 3.66-3.64 (t, 2H,  $J$  = 7.1 Hz), 3.59-3.57 (t, 4H,  $J$  = 7.2 Hz), 2.57-2.41 (AB quartet, 4H,  $J$  = 8.5 Hz) 2.54-2.28 (AB quartet, 2H,  $J$  = 8.6 Hz), 2.32-2.24 (m, 6H), 2.21 (s, 6H), 2.18 (s, 12H), 1.67-1.57 (m, 6H), 1.50-1.42 (m, 6H).  $^{13}\text{C}$  NMR (175 MHz,  $\text{CDCl}_3$ ):  $\delta$  (ppm) = 168.84, 168.78, 168.46, 157.23, 157.01, 156.86, 138.43, 138.20, 138.16, 130.80, 130.75, 130.73, 116.54, 116.39, 116.37, 65.76, 65.08, 59.21, 59.15, 49.31, 49.12, 45.44, 45.41, 37.82, 37.75, 26.67, 26.64, 24.95, 24.88. HRMS (ESI):  $m/z$  calcd for  $\text{C}_{57}\text{H}_{62}\text{N}_6\text{O}_{62}^+ [\text{M}+2\text{H}]^{2+}$ : 463.2360; found: 463.2355.

**Compound 3<sub>anti</sub>**: To 3 mL of dry acetonitrile, **3<sub>anti</sub>-NMe<sub>2</sub>** (21 mg, 0.023 mmol) and bromoethane (75 mg, 0.68 mmol) were added and the reaction mixture was brought to reflux overnight. Following, the mixture was cooled to room temperature and the solvent removed under reduced pressure to give a solid product. Recrystallization from  $\text{CH}_3\text{OH}$  : ethyl acetate = 3:1 gave 14 mg of **3<sub>anti</sub>** as yellow needles (61%).  $^1\text{H}$  NMR (600 MHz,  $\text{CD}_3\text{OD}$ ):  $\delta$  (ppm) = 7.82 (s, 2H), 7.76 (s, 2H), 7.72 (s, 2H), 4.68 (s, 2H), 4.67 (s, 2H), 4.65 (s, 2H), 3.73-3.71 (t, 2H,  $J$  = 6.4 Hz), 3.67-3.65 (t, 4H,  $J$  = 6.5 Hz), 3.42-3.37 (m, 12H), 3.07 (s, 6H), 3.05 (s, 12H), 2.52-2.31 (AB quartet, 4H,  $J$  = 8.4 Hz) 2.45-2.09 (AB quartet, 2H,  $J$  = 8.5 Hz), 1.77-1.70 (m, 12H), 1.39-1.35 (m, 9H).  $^{13}\text{C}$  NMR (150 MHz,  $\text{CD}_3\text{OD}$ ):  $\delta$  (ppm) = 168.82, 168.76, 168.72, 158.00, 157.98, 157.74, 138.56, 138.32, 138.28, 130.33, 130.29, 130.24, 116.02, 115.96, 115.73, 65.16, 64.61, 62.85, 62.80,

59.66, 49.36, 49.34, 48.86, 48.76, 36.25, 36.22, 25.11, 19.34, 7.10, 7.08. HRMS (ESI):  $m/z$  calcd for  $C_{63}H_{75}N_6O_6$ : 337.1911;  $[M]^{3+}$ , found: 337.1926.

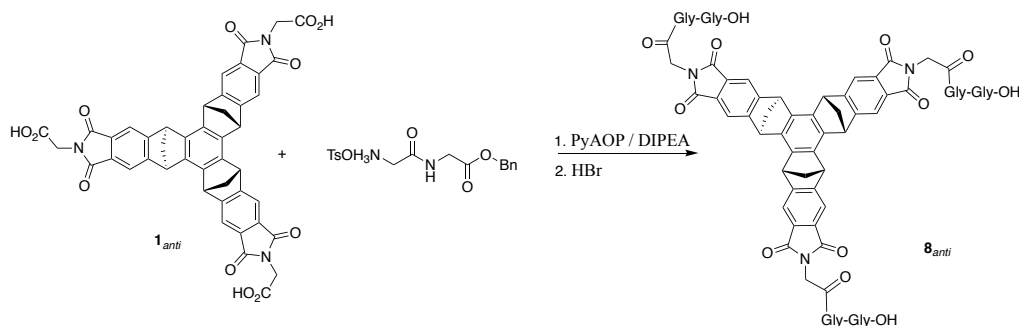

**Compound  $8_{anti}$ .** To a solution of  $1_{anti}$  (15 mg, 0.019 mmol) in 2 mL of dry DMF, *p*-TsOH Gly-Gly-OBn (28.2 mg, 0.074 mmol), PYAOP (7-Azabenzotriazol-1-yloxy)tripyrrolidinophosphonium hexafluorophosphate; 38.7 mg, 0.074 mmol) and DIPEA (*N,N*-diisopropylethylamine; 29.7  $\mu$ L, 0.17 mmol) were added in one portion. The reaction mixture was stirred overnight. Following, the solvent was removed by a steady nitrogen flow. The crude product was purified by column chromatography ( $SiO_2$ ;  $CH_2Cl_2$  :  $CH_3OH$  = 20:1), to give  $8_{anti}$ -OBn as a white powder (24.3 mg, 92%).  $^1H$  NMR (850 MHz,  $CD_3SOCD_3$ ):  $\delta$  (ppm) = 8.54-8.53 (t, 1H,  $J$  = 5.8 Hz), 8.49-8.48 (t, 2H,  $J$  = 5.8 Hz), 8.37-8.36 (t, 1H,  $J$  = 5.9 Hz), 8.34-8.32 (t, 2H,  $J$  = 5.9 Hz), 7.90 (s, 2H), 7.86 (s, 2H), 7.77 (s, 2H), 7.73-7.30 (m, 15H), 5.13 (s, 2H), 5.12 (s, 4H), 4.76 (s, 2H), 4.74 (s, 2H), 4.70 (s, 2H), 4.23 (s, 2H), 4.16 (s, 4H), 3.92-3.91 (d, 2H,  $J$  = 5.9 Hz), 3.91-3.90 (d, 4H,  $J$  = 5.9 Hz), 3.77-3.76 (d, 2H,  $J$  = 5.7 Hz), 3.74-3.73 (d, 4H,  $J$  = 5.7 Hz), 2.48-2.33 (AB quartet, 4H,  $J$  = 7.5 Hz), 2.46-2.12 (AB quartet, 2H,  $J$  = 7.7 Hz).  $^{13}C$  NMR (213 MHz,  $CD_3SOCD_3$ ):  $\delta$  (ppm) = 170.09, 170.08, 169.60, 169.59, 168.16, 168.05, 168.03, 167.02, 166.98, 158.38, 158.30, 158.23, 138.72, 138.61, 138.41, 136.34, 136.33, 130.51, 130.46, 130.36, 128.89, 128.88, 128.51, 128.37, 116.85, 116.78, 116.73, 66.31, 65.61, 65.15, 48.81, 48.65, 48.63, 46.34, 46.32, 42.18, 41.13. Compound  $8_{anti}$ -OBn (13.6 mg, 0.01 mmol) was dissolved in 1 mL of HBr (33 wt% in  $CH_3CO_2H$ ) solution. The mixture was brought to 50  $^{\circ}C$  for 6 h. Following, the solvent was removed under reduced pressure and the solid residue washed by 0.1M HCl solution (2 x 5 mL). The solid was lyophilized to give  $8_{anti}$  as white powder (6 mg, 55%).  $^1H$  NMR (700 MHz,  $CD_3SOCD_3$ ):  $\delta$  (ppm) = 12.57 (broad, COOH) 8.51-8.50 (t, 1H,  $J$  = 5.7 Hz), 8.47-8.45 (t, 2H,  $J$  = 5.7 Hz), 8.22-8.20 (t, 1H,  $J$  = 5.9 Hz), 8.18-8.17 (t, 2H,  $J$  = 5.8 Hz), 7.90 (s, 2H), 7.86 (s, 2H), 7.77 (s, 2H), 4.76 (s, 2H), 4.74 (s, 2H), 4.70 (s, 2H), 4.23 (s, 2H), 4.16 (s, 4H), 3.92-3.91 (d, 2H,  $J$  = 5.9 Hz), 3.91-3.90 (d, 4H,  $J$  = 5.9 Hz), 3.77-3.72 (m, 12H), 2.49-2.33 (AB quartet, 4H,  $J$

= 7.7 Hz), 2.46-2.13 (AB quartet, 2H,  $J = 7.7$  Hz).  $^{13}\text{C}$  NMR (150 MHz,  $\text{CD}_3\text{SOCD}_3$ ):  $\delta$  (ppm) = 171.55, 169.35, 168.18, 168.07, 168.04, 166.99, 166.97, 158.40, 158.33, 158.25, 138.73, 138.62, 138.42, 130.51, 130.46, 130.37, 116.86, 116.79, 116.75, 65.61, 65.16, 48.81, 48.63, 42.20, 41.02. HRMS (ESI):  $m/z$  Calcd for  $\text{C}_{57}\text{H}_{43}\text{N}_9\text{O}_{18}^{2-}$ : 570.6369;  $[\text{M}]^{2-}$ ; found: 570.6363.

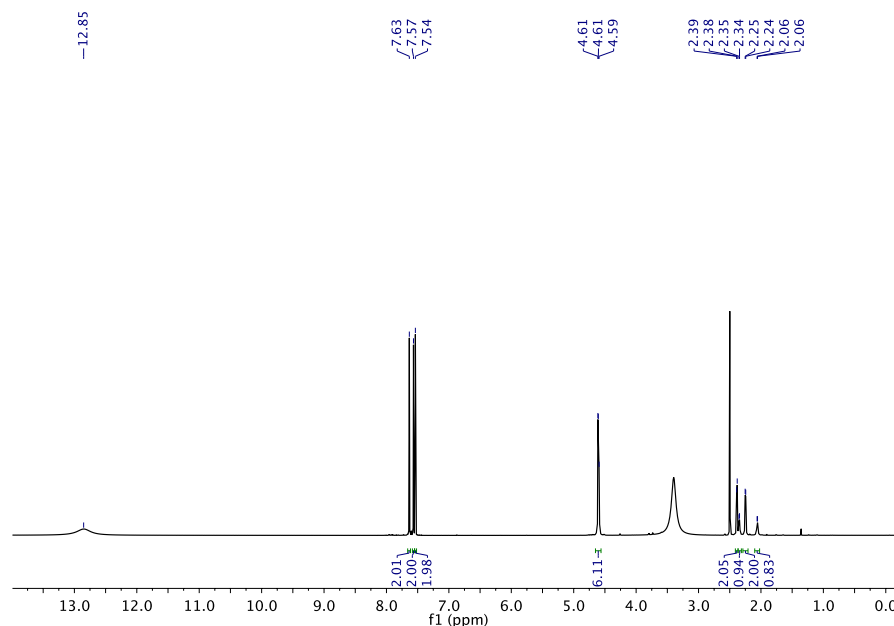

**Figure S1.**  $^1\text{H}$  NMR spectrum (850 MHz, 298 K) of **4<sub>anti</sub>** in  $(\text{CD}_3)_2\text{SO}$ .

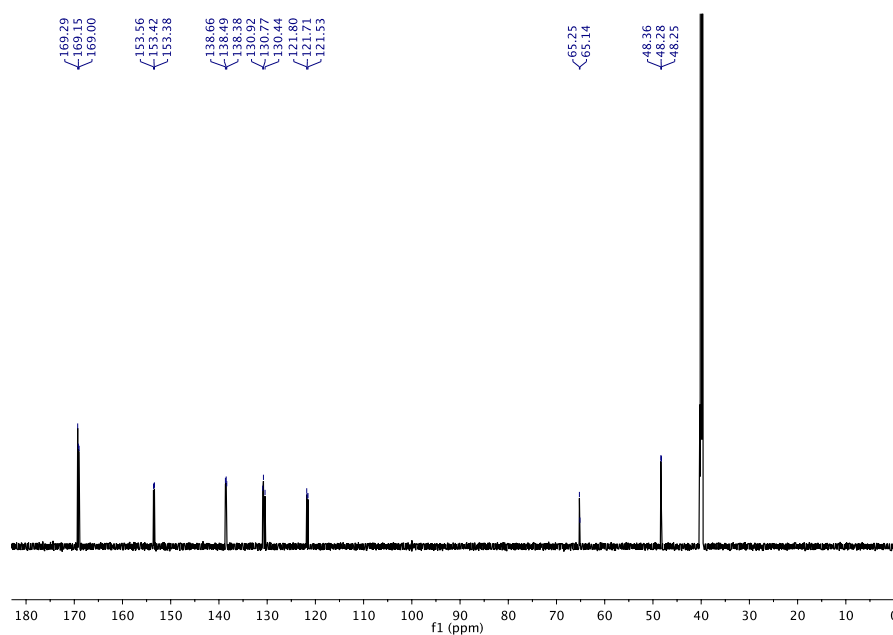

**Figure S2.**  $^{13}\text{C}$  NMR spectrum (213 MHz, 298 K) of **4<sub>anti</sub>** in  $(\text{CD}_3)_2\text{SO}$ .

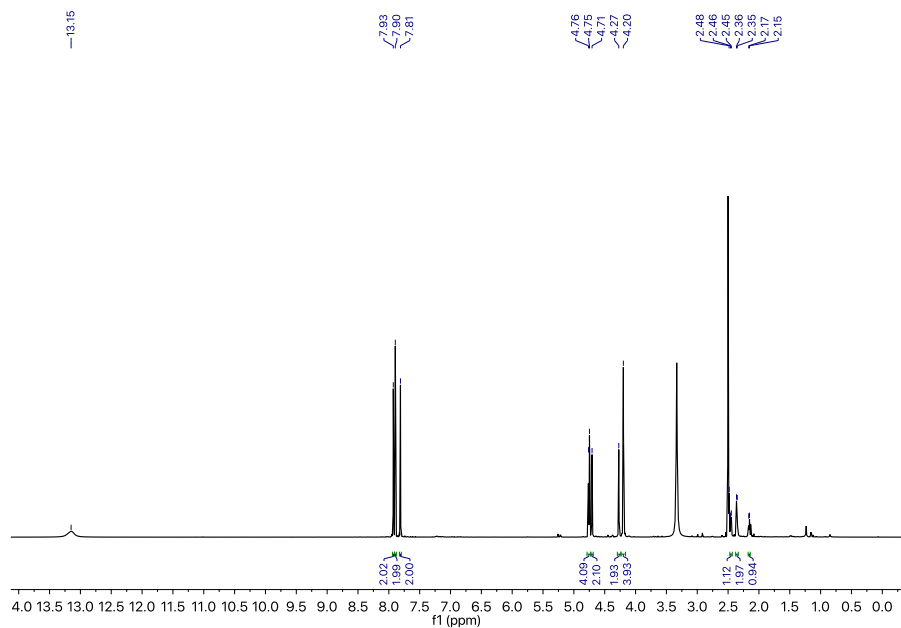

**Figure S3.** <sup>1</sup>H NMR spectrum (700 MHz, 298 K) of 5 mM **1<sub>anti</sub>** in (CD<sub>3</sub>)<sub>2</sub>SO.

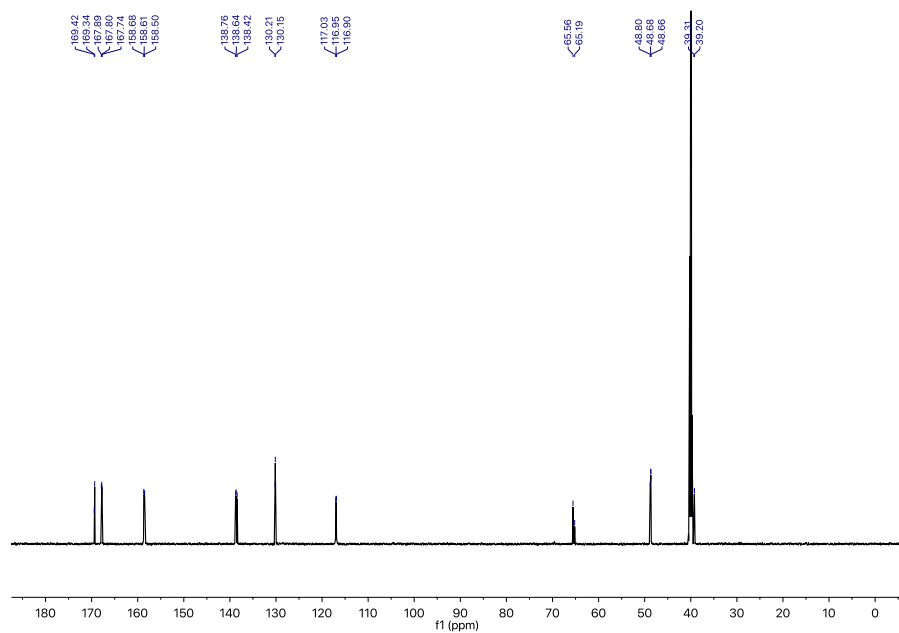

**Figure S4.** <sup>13</sup>C NMR spectrum (175 MHz, 298 K) of 5 mM **1<sub>anti</sub>** in (CD<sub>3</sub>)<sub>2</sub>SO.

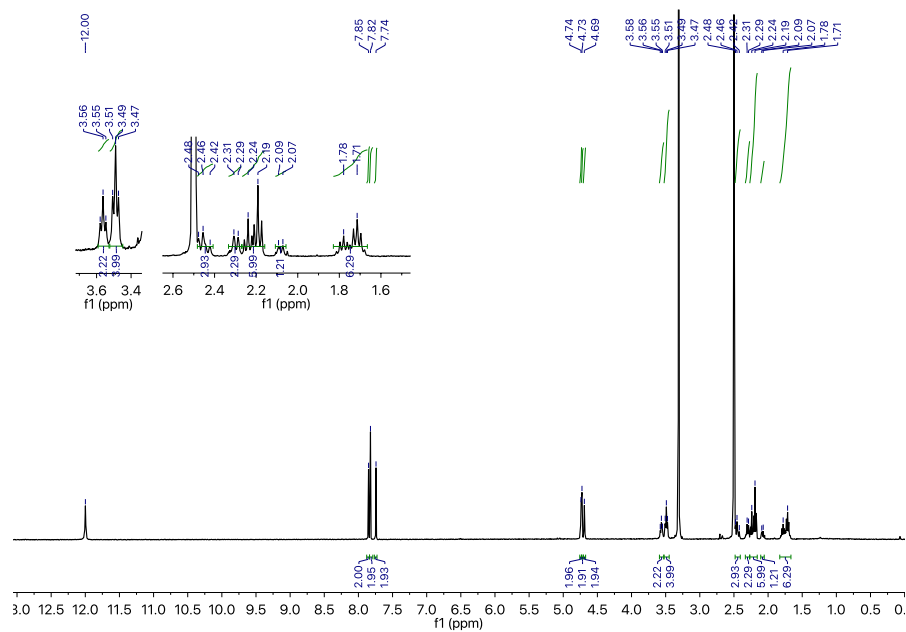

**Figure S5.** <sup>1</sup>H NMR spectrum (400 MHz, 298 K) of 2 mM **2<sub>anti</sub>** in (CD<sub>3</sub>)<sub>2</sub>SO.

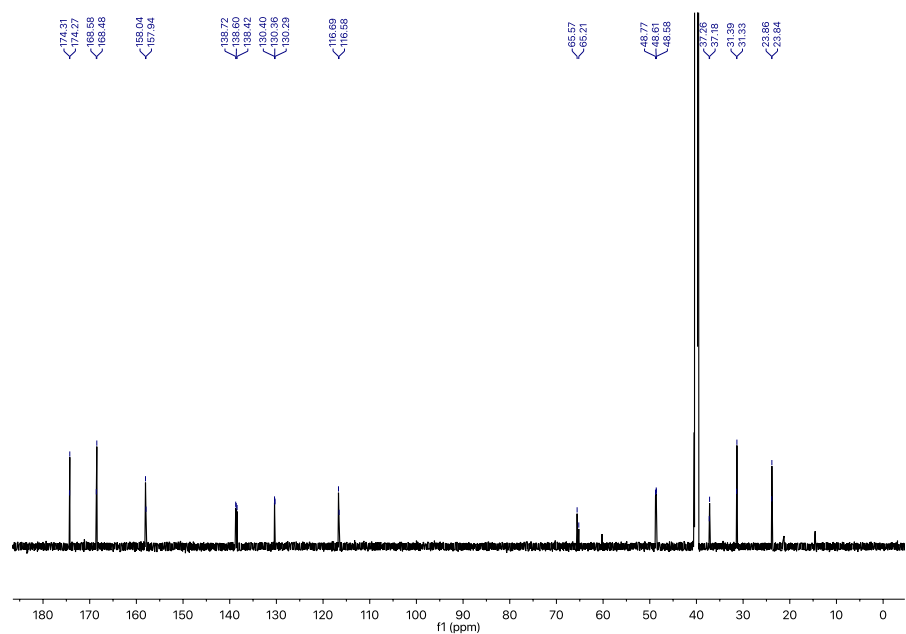

**Figure S6.** <sup>13</sup>C NMR spectrum (213 MHz, 298 K) of 2 mM **2<sub>anti</sub>** in (CD<sub>3</sub>)<sub>2</sub>SO.

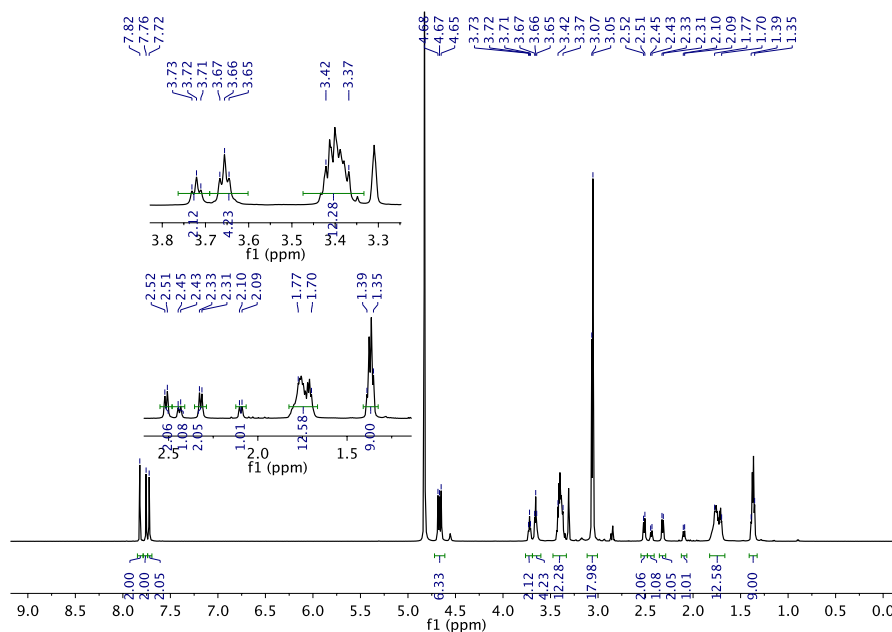

**Figure S7.** <sup>1</sup>H NMR spectrum (600 MHz, 298 K) of 2 mM **3<sub>anti</sub>** in CD<sub>3</sub>OD.

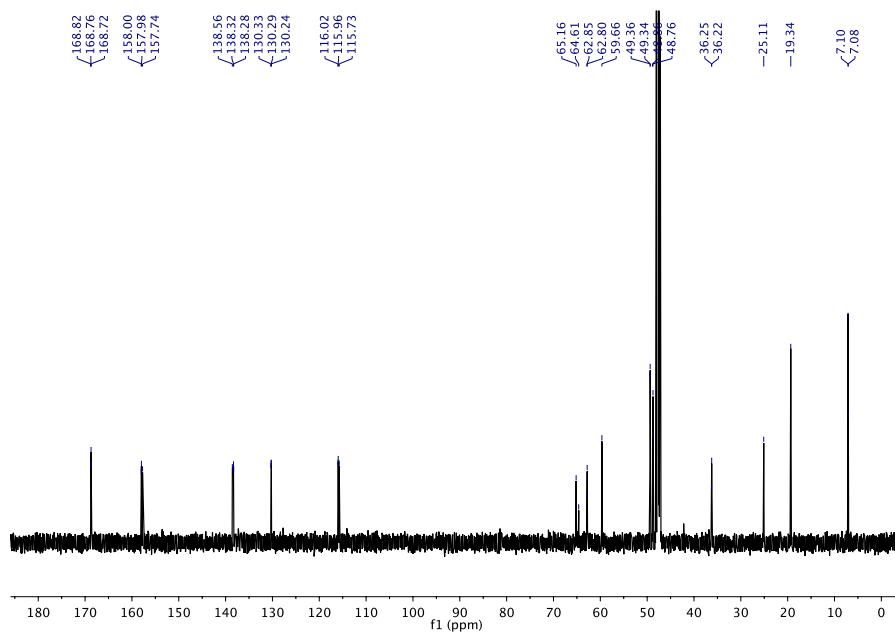

**Figure S8.** <sup>13</sup>C NMR spectrum (150 MHz, 298 K) of 2 mM **3<sub>anti</sub>** in CD<sub>3</sub>OD.

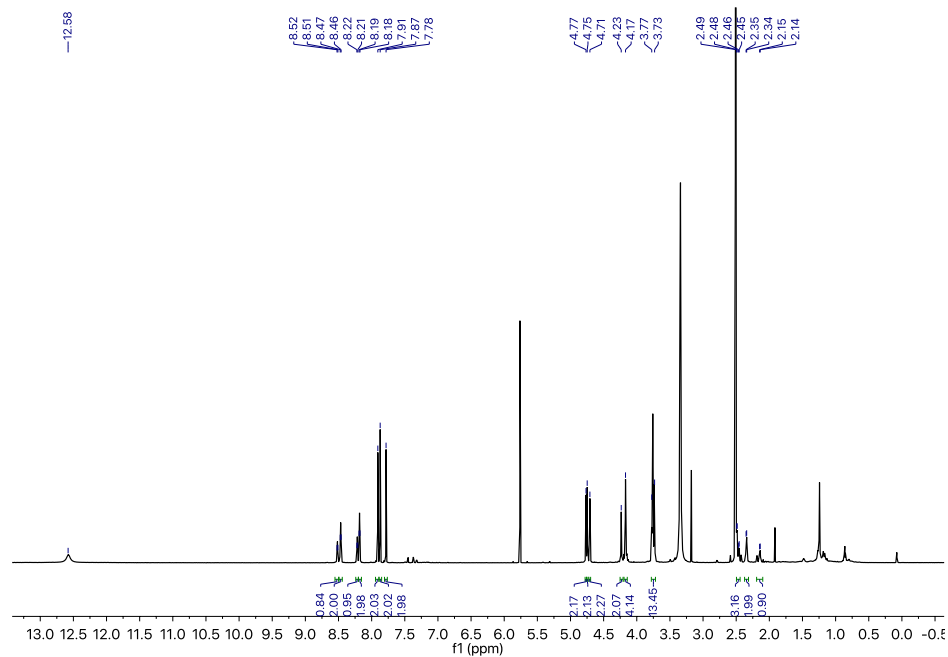

Figure S9.  $^1\text{H}$  NMR spectrum (850 MHz, 298 K) of **8<sub>anti</sub>** in  $(\text{CD}_3)_2\text{SO}$ .

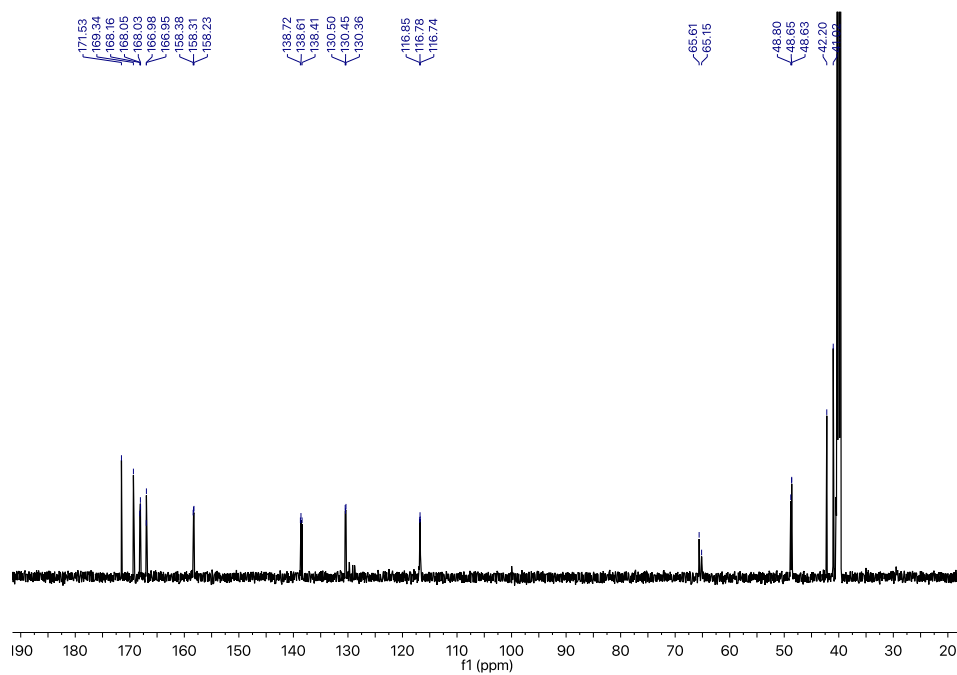

Figure S10.  $^{13}\text{C}$  NMR spectrum (175 MHz, 298 K) of **8<sub>anti</sub>** in  $(\text{CD}_3)_2\text{SO}$ .



## $^1\text{H}$ NMR Spectroscopic and ESI-MS Experiments

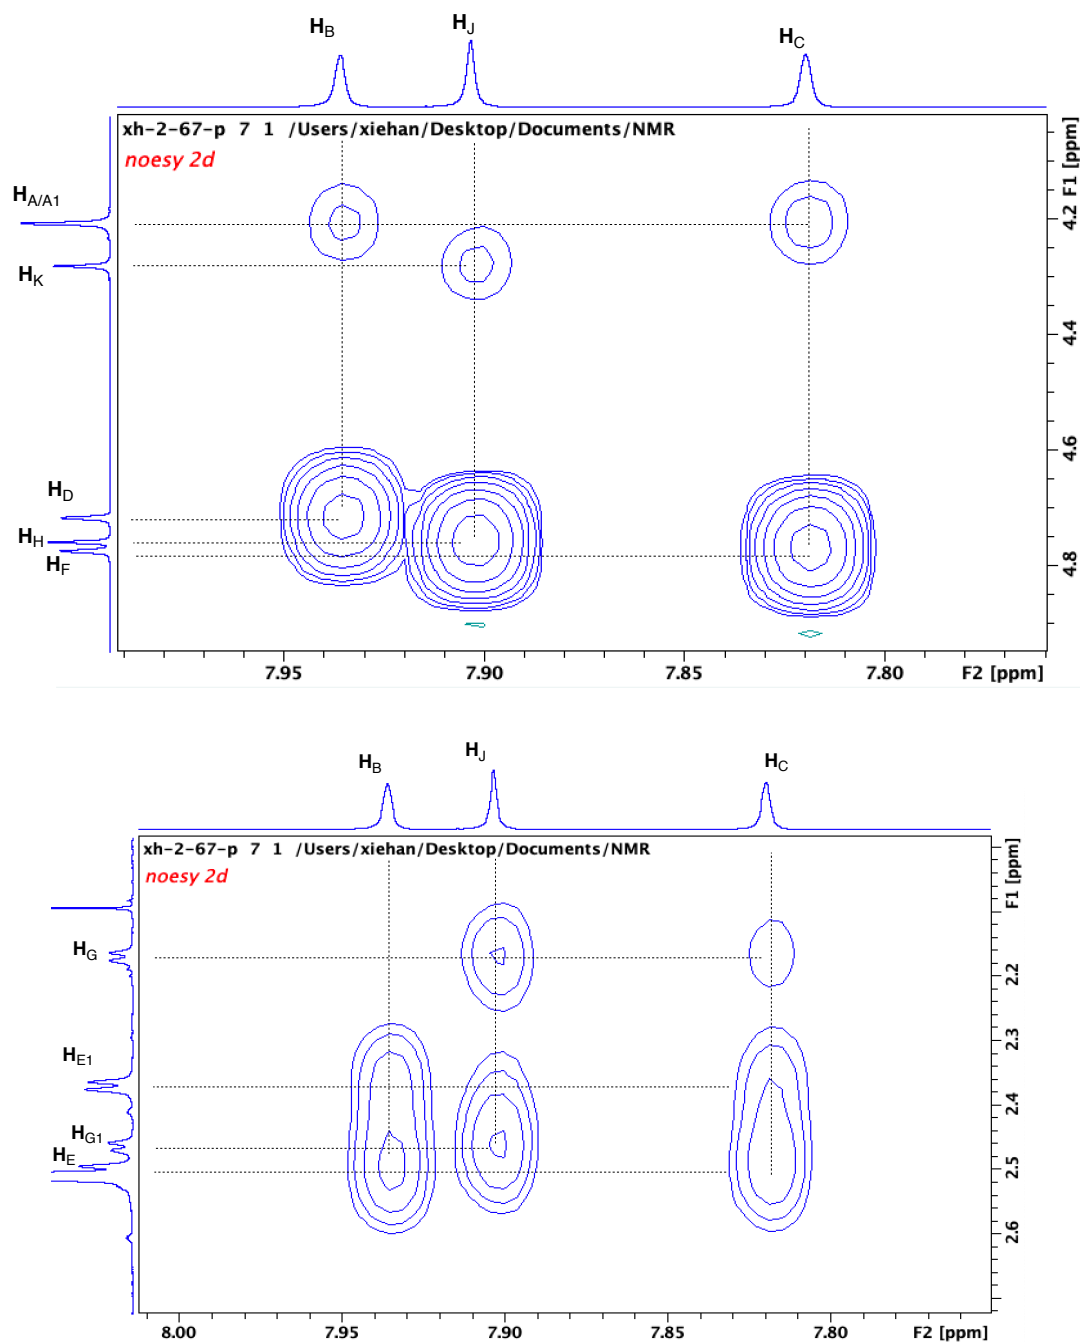

**Figure S11.** Two regions of 2D NOESY NMR spectrum (600 MHz, 298 K) of 5.0 mM solution of  $\mathbf{1}_{\text{anti}}$  in  $(\text{CD}_3)_2\text{SO}$  showing important cross-correlations. We used the integration ratio of  $\text{H}_{\text{A/A1}}$  and  $\text{H}_{\text{K}}$  resonances to distinguish these protons and then as a starting point to assign other nuclei.

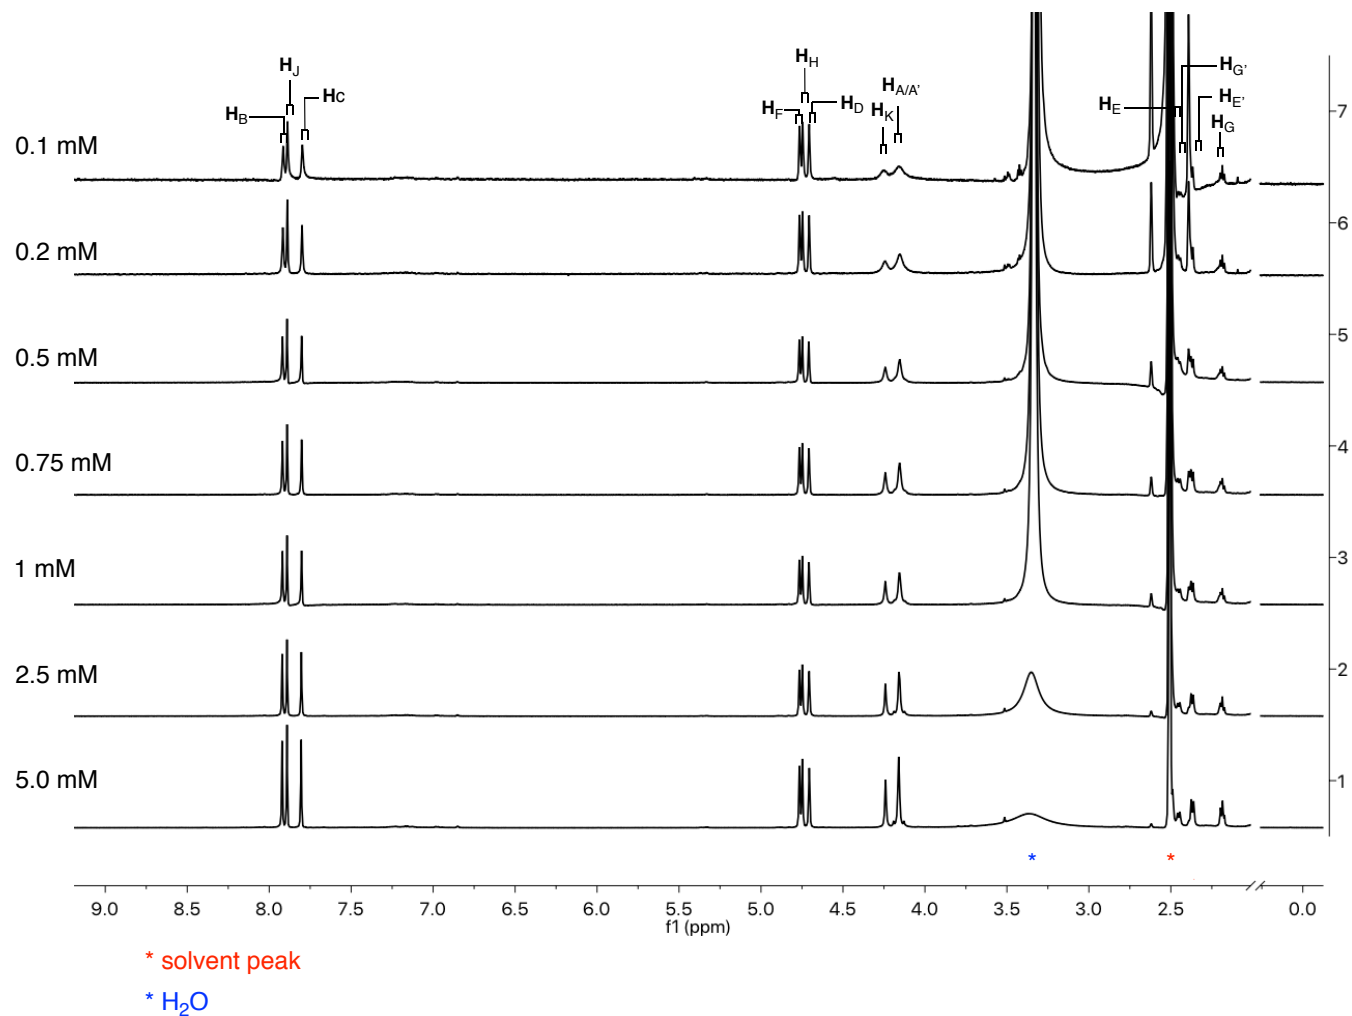

**Figure S12.**  $^1\text{H}$  NMR spectra (600 MHz, 298 K) of 5.0 mM **1<sub>anti</sub>** in  $(\text{CD}_3)_2\text{SO}$  (bottom) and its more diluted solutions (concentrations are shown on the left).

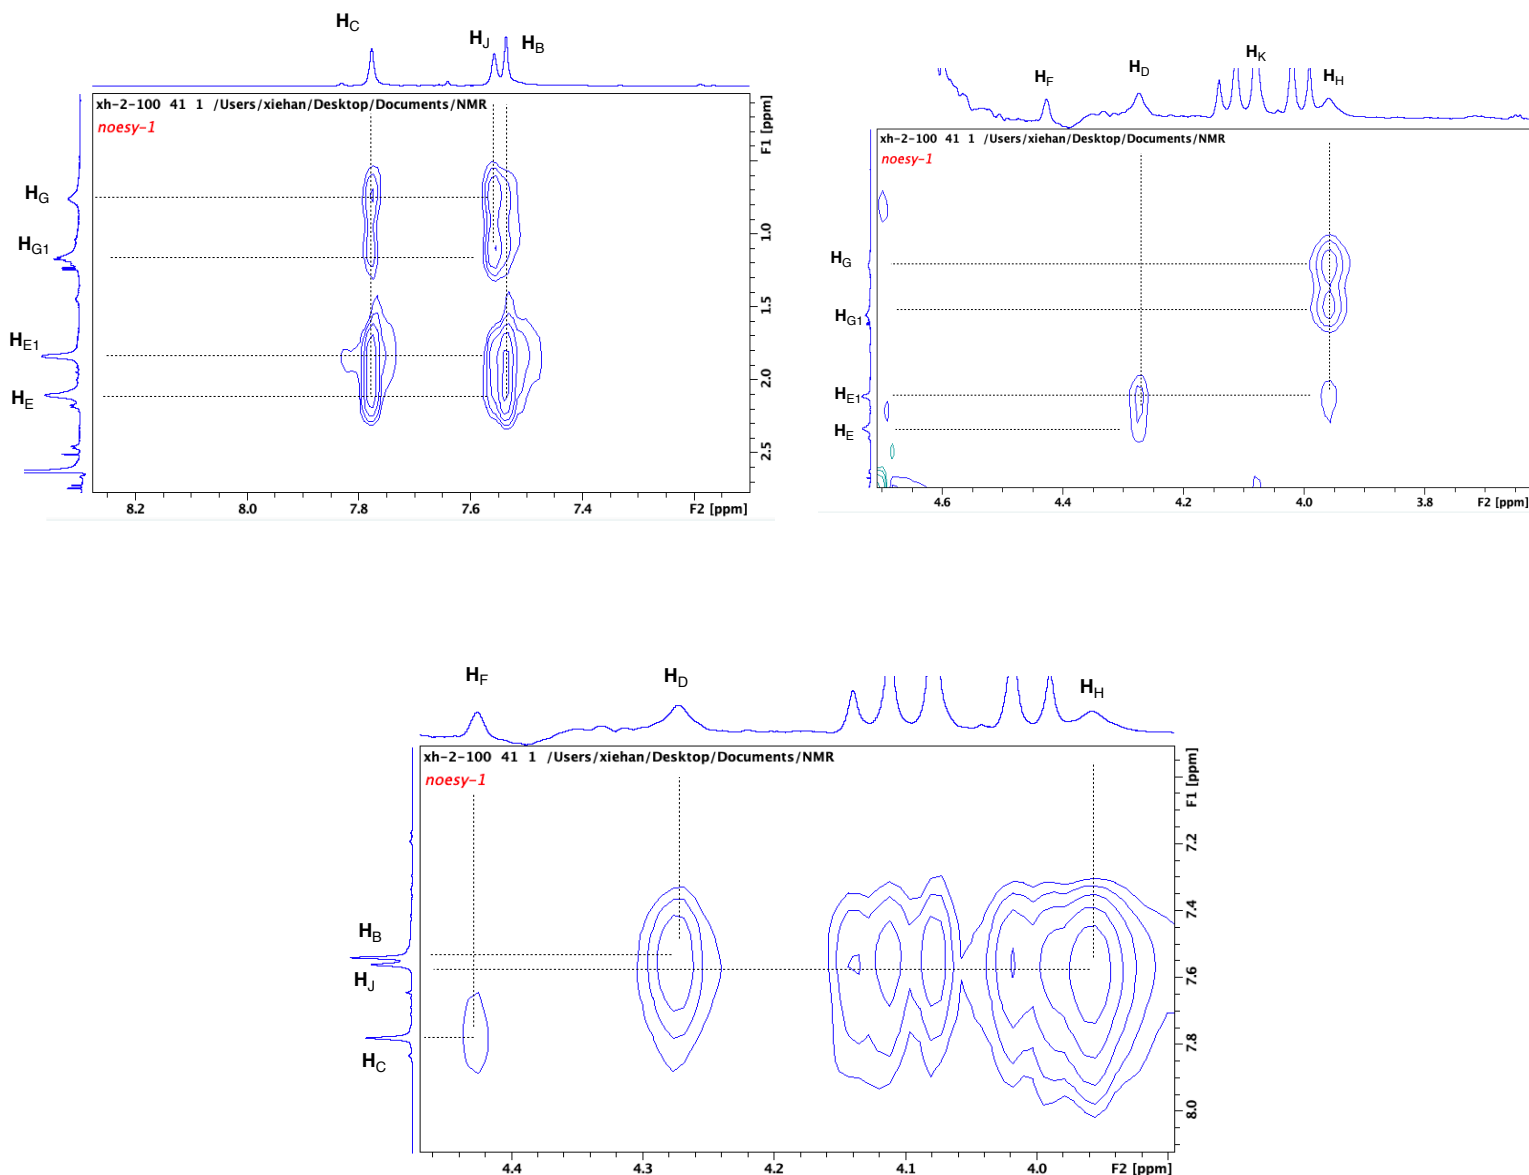

**Figure S13.** Selected regions of 2D NOESY NMR spectrum (600 MHz, 298 K) of 5.0 mM solution (H<sub>2</sub>O: D<sub>2</sub>O = 9:1, 0.1 M phosphate salts and 0.1 M NaCl) of [**1**<sub>anti</sub>]<sup>3-</sup> at pH = 7.2. We used the integration ratio of **H**<sub>E/E1</sub> and **H**<sub>G/G1</sub> resonances to distinguish them and then assign the remaining nuclei.

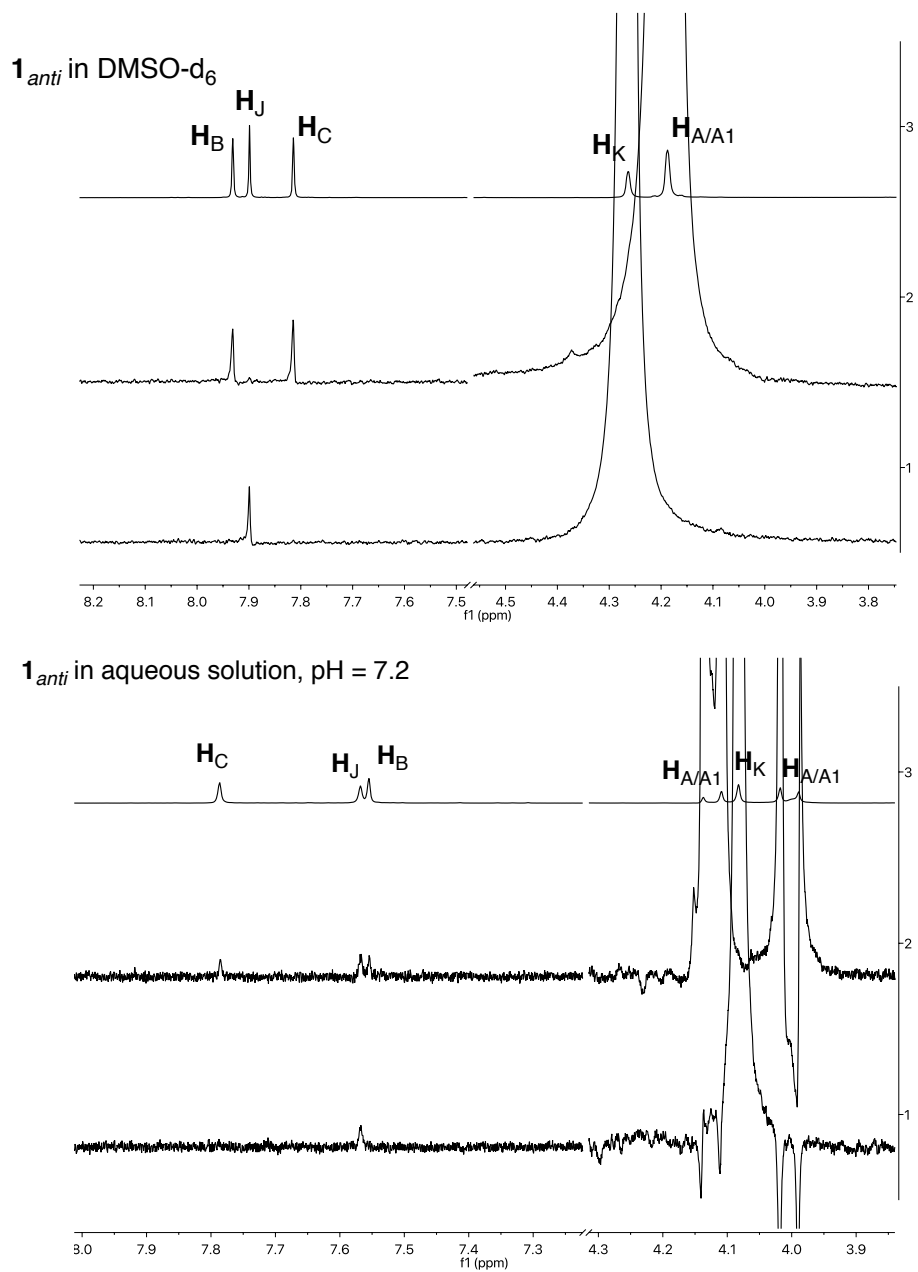

**Figure S14.** 1D NOE spectra (600 MHz, 298 K) of 5.0 mM solution of **1<sub>anti</sub>** in DMSO-d<sub>6</sub> (top) and [**1<sub>anti</sub>**]<sub>2</sub><sup>3-</sup> in water (H<sub>2</sub>O: D<sub>2</sub>O = 9:1, 0.1 M phosphate salts and 0.1 M NaCl, bottom) obtained after the selective irradiation of **H<sub>A/A1</sub>** (middle spectrum in each set) and **H<sub>K</sub>** (bottom spectrum in each set) resonances.

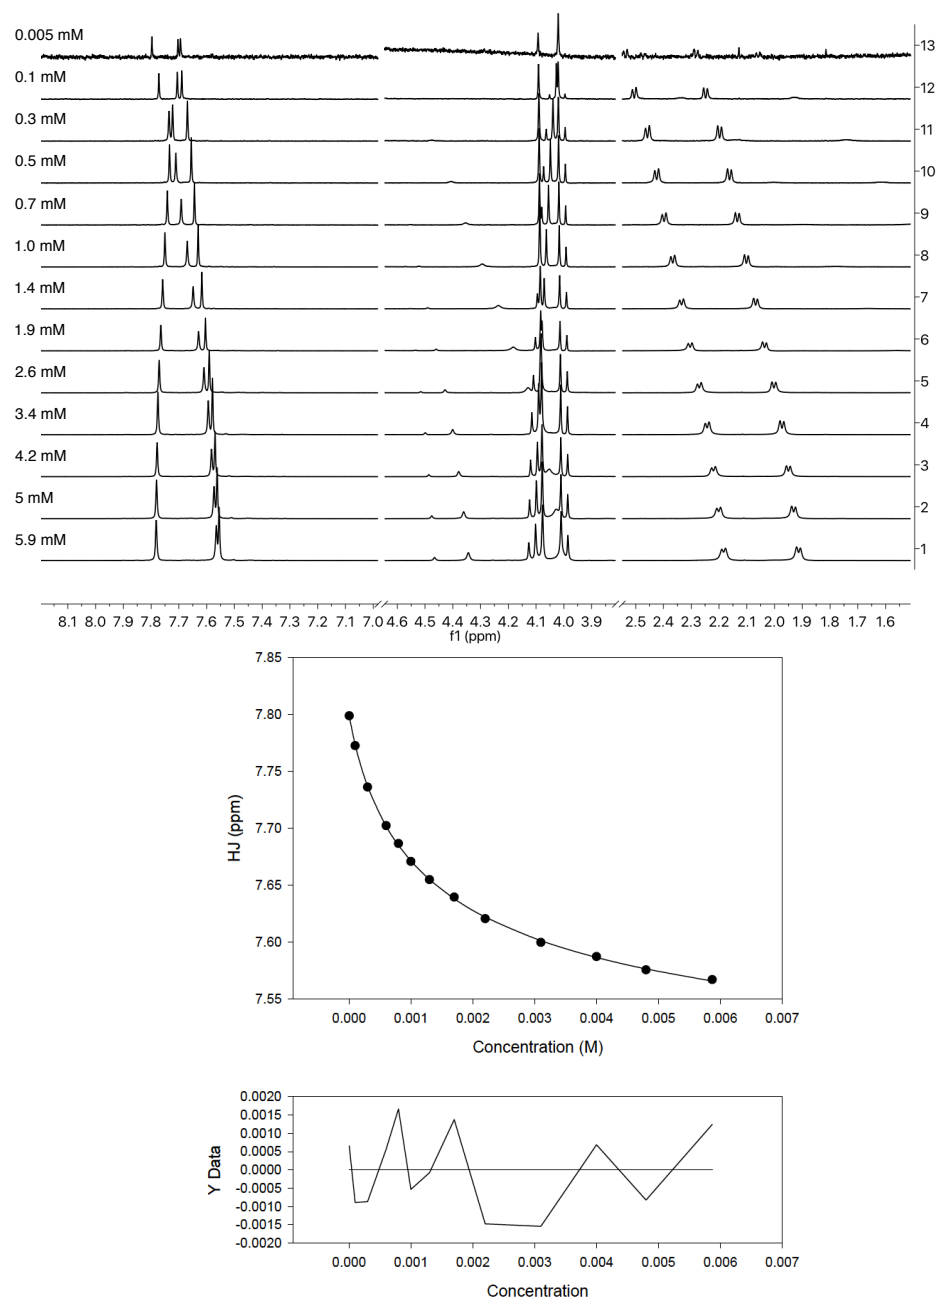

**Figure S15.** (Top)  $^1\text{H}$  NMR spectra (600 MHz, 298 K) of  $[\mathbf{1}_{anti}]^{3-}$  at different concentrations (shown on the left) in 0.1 M phosphate buffer at pH = 7.2. (Bottom) Nonlinear least-square analysis of  $^1\text{H}$  NMR binding data corresponding to the formation of homodimer  $[\mathbf{1}_{anti}]_2^{6-}$ . Using the change in chemical shift of  $\mathbf{H}_J$  as a function of the overall concentration of  $[\mathbf{1}_{anti}]^{3-}$  we obtained stability constant  $K_a = 410 \pm 10 \text{ M}^{-1}$  (SigmaPlot) as arithmetic mean of two separate measurements with the standard deviation as error. A random distribution of residuals is shown at the bottom.

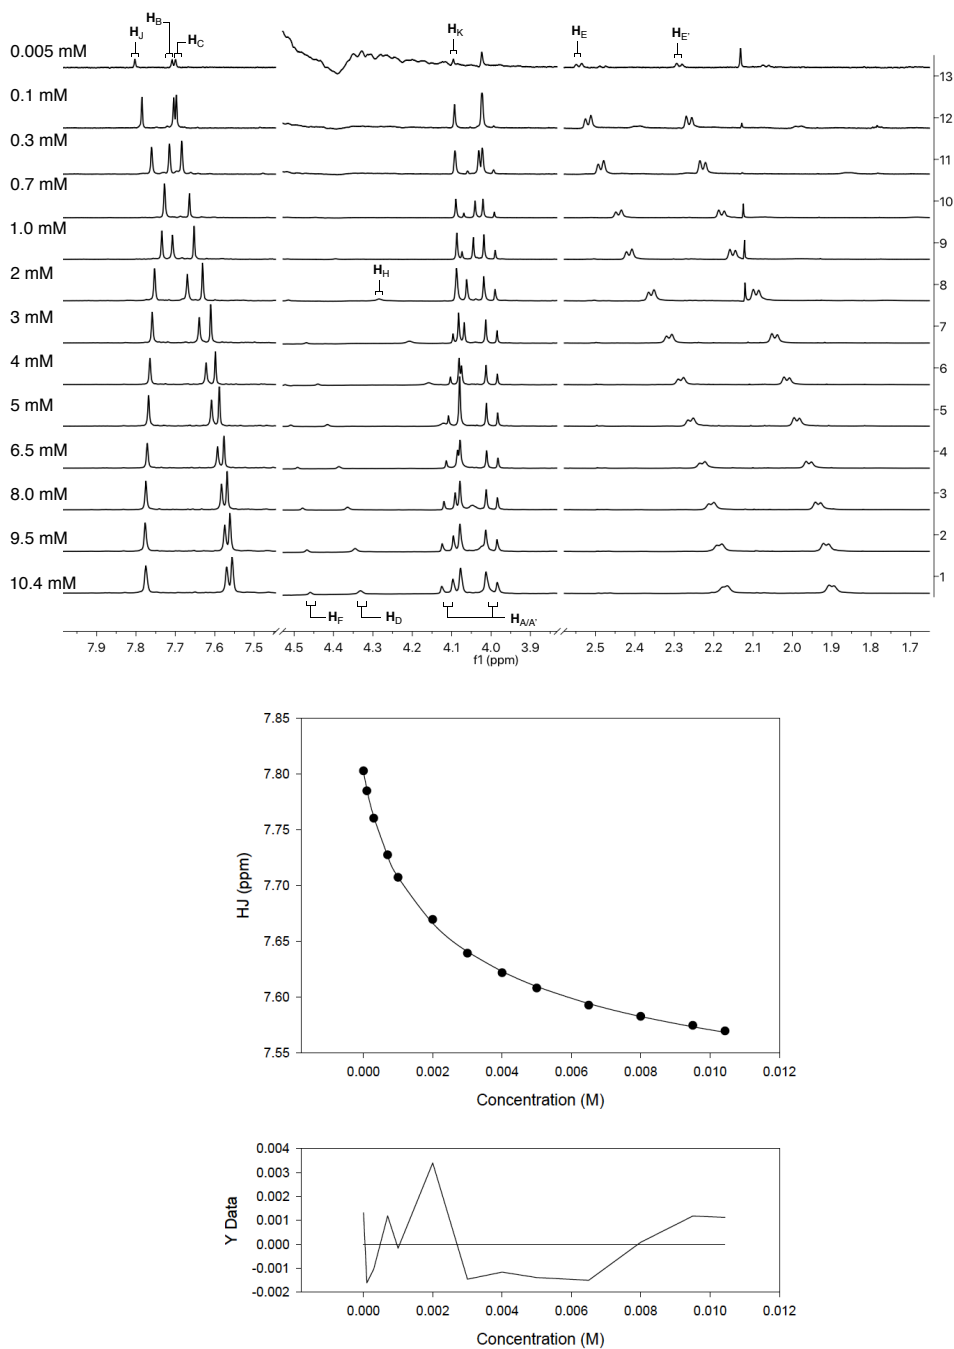

**Figure S16.** (Top)  $^1\text{H}$  NMR spectra (600 MHz, 298 K) of  $[\mathbf{1}_{anti}]^{3-}$  at different concentrations (shown on the left) in 25 mM phosphate buffer at pH = 7.2. (Bottom). Nonlinear least-square analysis of  $^1\text{H}$  NMR binding data corresponding to the formation of homodimer  $[\mathbf{1}_{anti}]_2^{6-}$ . Using the change in chemical shift of  $\mathbf{H}_J$  as a function of the overall concentration (one shown in Figure 4B, and another one here) of  $[\mathbf{1}_{anti}]^{3-}$  we obtained stability constant  $K_a = 152 \pm 60 \text{ M}^{-1}$  (SigmaPlot) as an arithmetic mean of three separate measurements with the standard deviation as error. A random distribution of residuals is shown at the bottom.

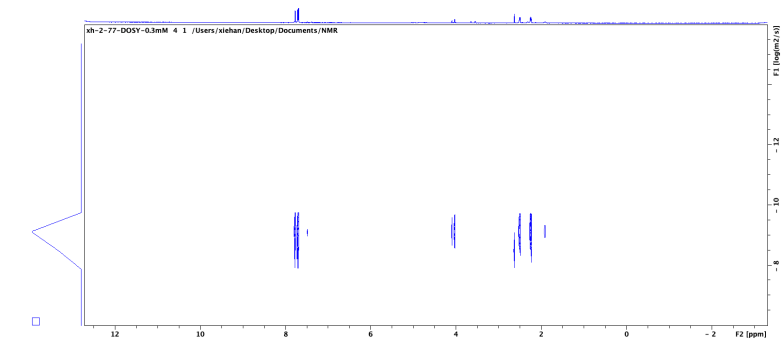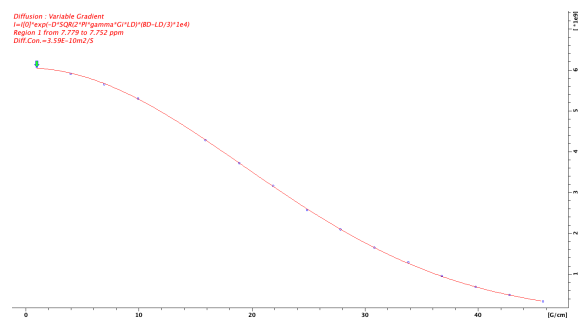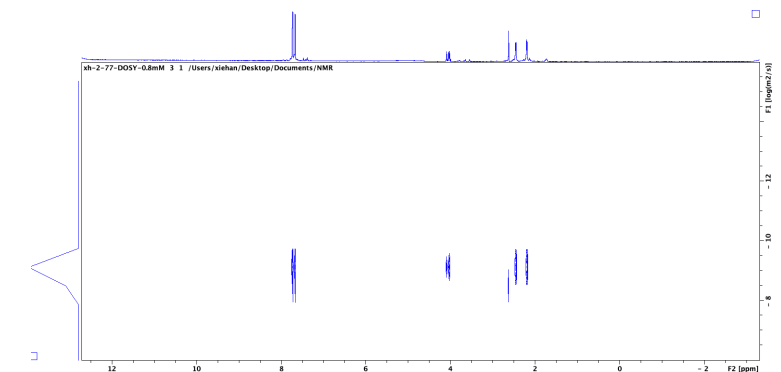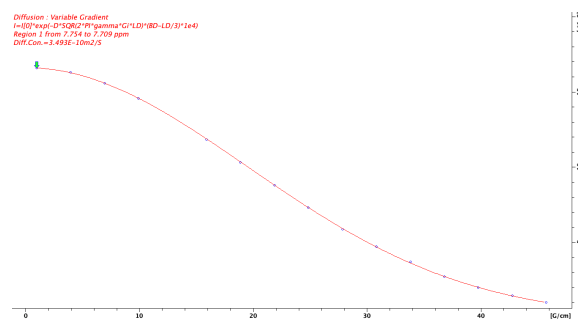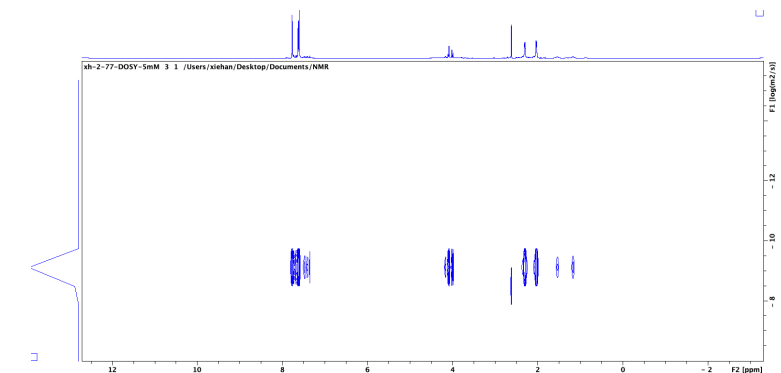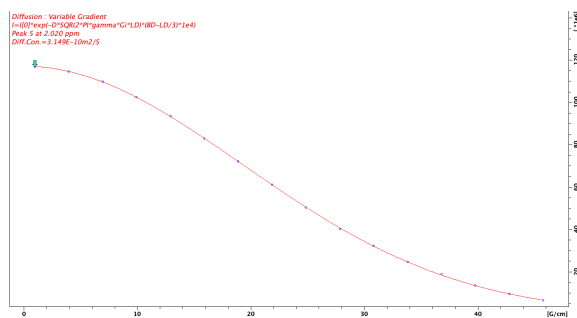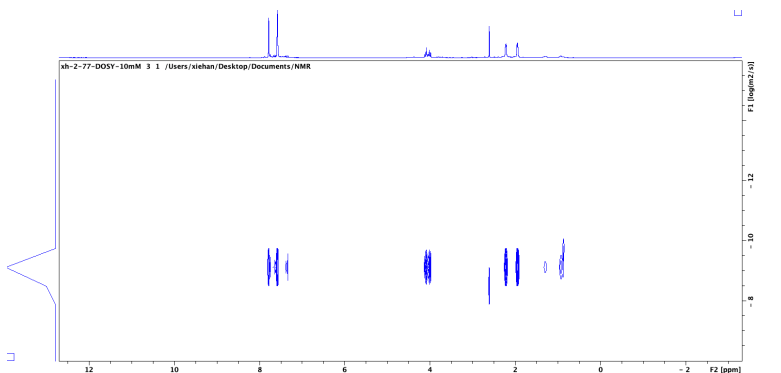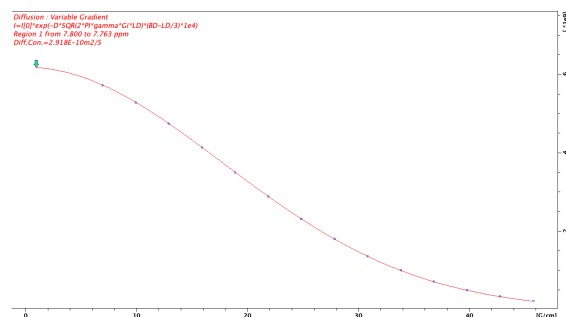

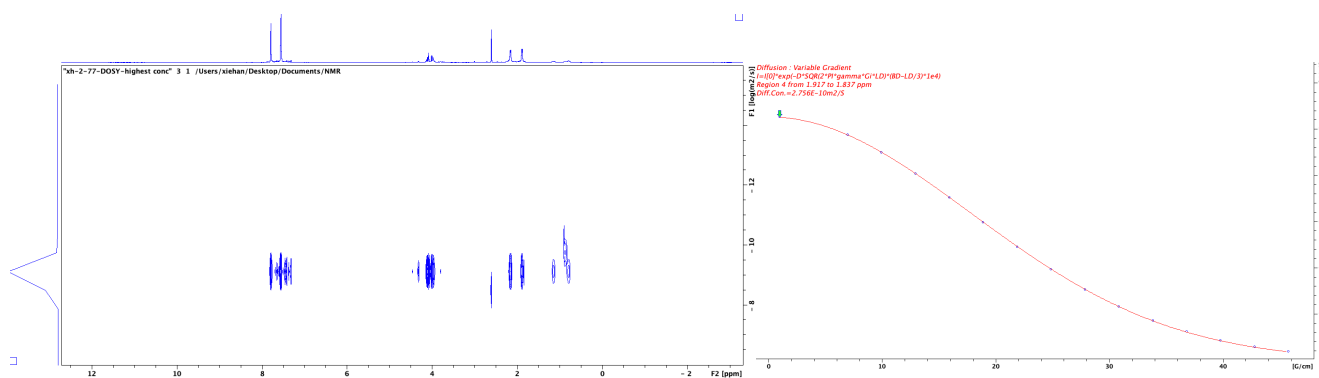

**Figure S17.** (Left) DOSY NMR spectra (600 MHz, 298 K) of  $[\mathbf{1}_{anti}]^{3-}$  in 25 mM phosphate buffer ( $\text{H}_2\text{O}:\text{D}_2\text{O} = 9:1$ ) at  $\text{pH} = 7.2$ . (Right) The change in intensity of resonance corresponding to  $\text{H}_I$  proton as a function of the field gradient  $g$  (G/cm) was obtained using the pulse field gradient stimulated echo sequence with bipolar gradient pulse pair, 1 spoil gradient, 3-9-19 WATERGATE solvent suppression (stebpgp1s19) pulse sequence and the data was fit to the Stejskal-Tanner equation to give the value of diffusion coefficient  $D_{app}$  ( $\text{m}^2/\text{s}$ ); The hydrodynamic radii was computed using the Stokes-Einstein equation whereby the viscosity of 25 mM phosphate buffer at  $\text{pH} = 7.2 \pm 0.1$  is assumed to be similar to that of  $\text{H}_2\text{O}:\text{D}_2\text{O} = 9:1$  ( $\eta = 0.91 \text{ mPa s}$  at 298.1). From top to bottom, the overall concentration of  $[\mathbf{1}_{anti}]^{3-}$  and  $D_{app}$  are as follows: (A) 0.3 mM,  $D_{app} = 3.59 \times 10^{-10} \text{ m}^2\text{s}^{-1}$  (B) 0.8 mM,  $D_{app} = 3.49 \times 10^{-10} \text{ m}^2\text{s}^{-1}$  (C) 5.0 mM,  $D_{app} = 3.15 \times 10^{-10} \text{ m}^2\text{s}^{-1}$  (D) 10.0 mM,  $D_{app} = 2.92 \times 10^{-10} \text{ m}^2\text{s}^{-1}$  (E) 15.7 mM,  $D_{app} = 2.76 \times 10^{-10} \text{ m}^2\text{s}^{-1}$ .



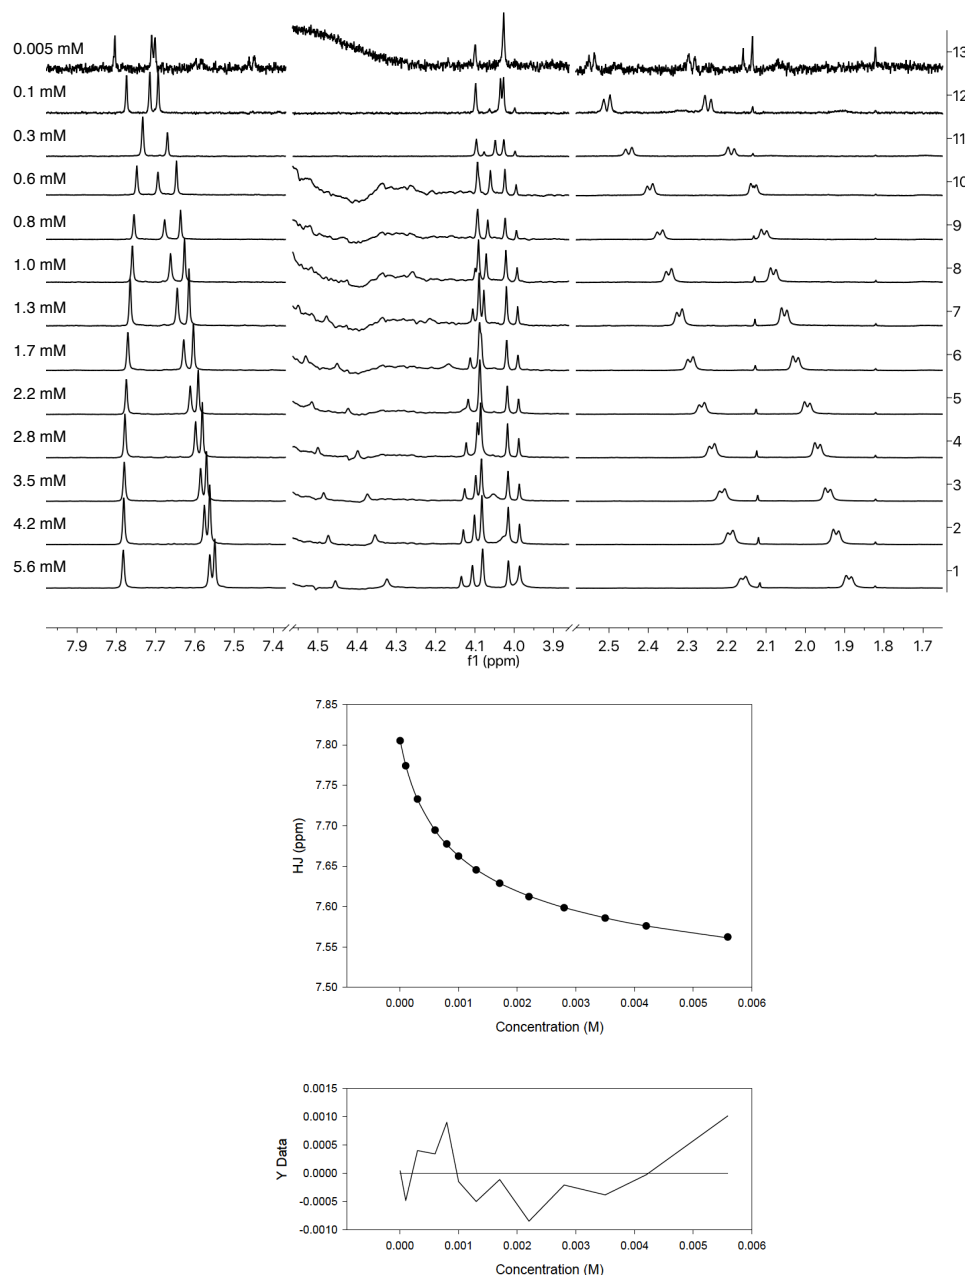

**Figure S18.** (Top)  $^1\text{H}$  NMR spectra (600 MHz, 298 K) of  $[\mathbf{1}_{anti}]^{3-}$  at different concentrations (shown on the left) in 0.1 M phosphate buffer containing 0.1 M NaCl at pH = 7.2. (Bottom). Nonlinear least-square analysis of  $^1\text{H}$  NMR binding data corresponding to the formation of homodimer  $[\mathbf{1}_{anti}]_2^{6-}$ . Using the change in chemical shift of  $\text{H}_J$  as a function of the overall concentration of  $[\mathbf{1}_{anti}]^{3-}$  we obtained stability constant  $K_a = 570 \pm 62 \text{ M}^{-1}$  (SigmaPlot) as an arithmetic mean of two separate measurements with the standard deviation as error. A random distribution of residuals is shown at the bottom.

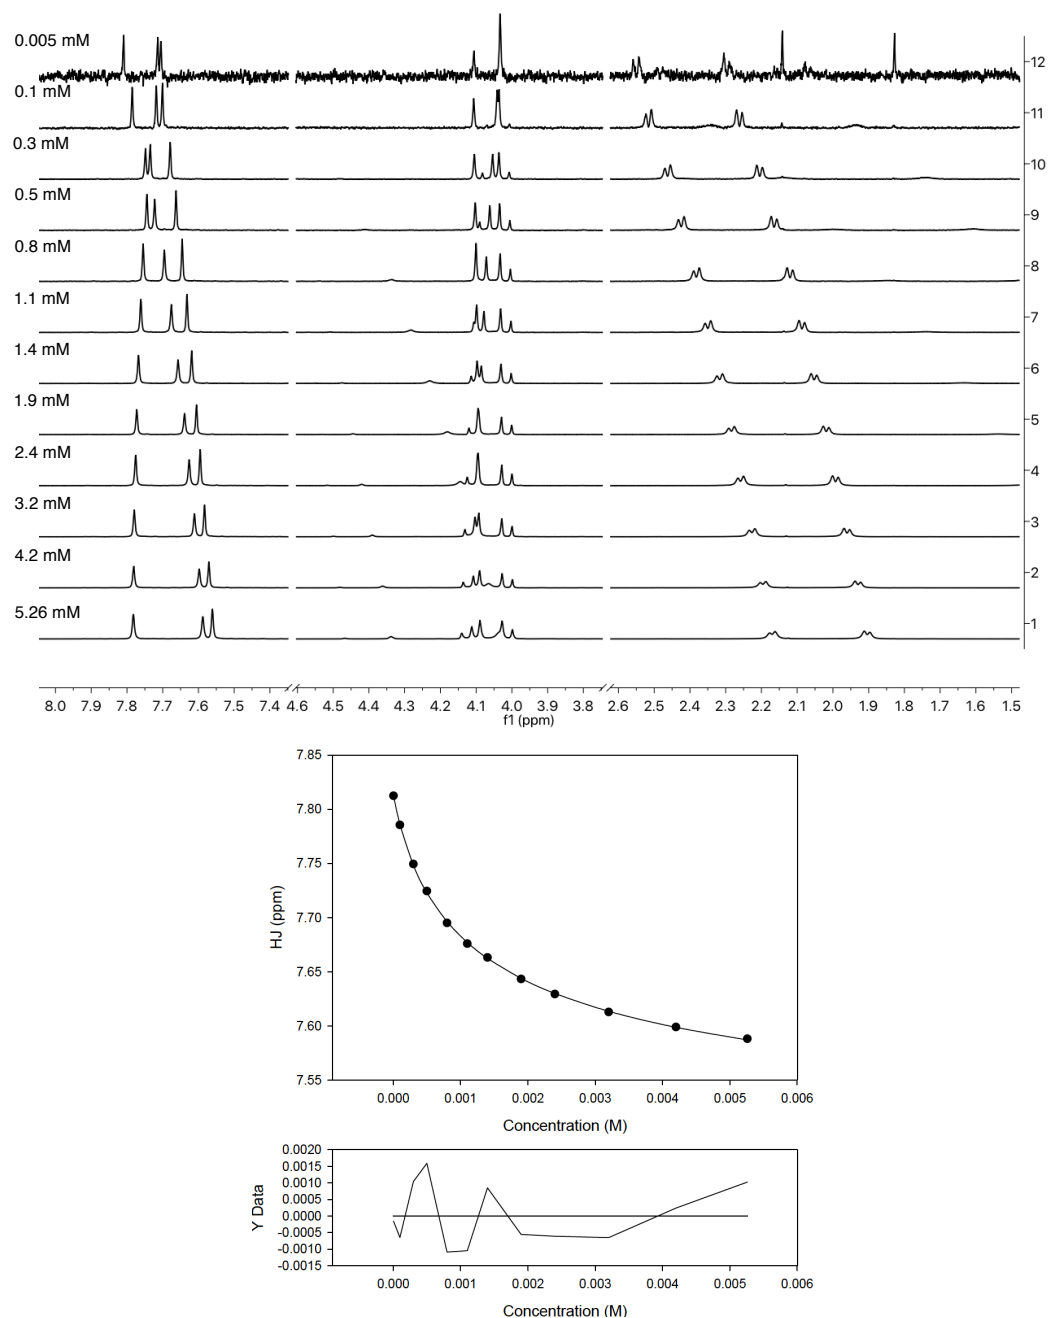

**Figure S19.** (Top)  $^1\text{H}$  NMR spectra (600 MHz, 298 K) of  $[\mathbf{1}_{anti}]^{3-}$  at different concentrations (shown on the left) in 0.1 M phosphate buffer containing 0.1 M  $\text{NaClO}_4$  at pH = 7.2. (Bottom). Nonlinear least-square analysis of  $^1\text{H}$  NMR binding data corresponding to the formation of homodimer  $[\mathbf{1}_{anti}]_2^{6-}$ . Using the change in chemical shift of  $\text{H}_I$  as a function of the overall concentration of  $[\mathbf{1}_{anti}]^{3-}$  we obtained stability constant  $K_a = 458 \pm 11 \text{ M}^{-1}$  (SigmaPlot) as an arithmetic mean of two separate measurements with the standard deviation as error. A random distribution of residuals is shown at the bottom.

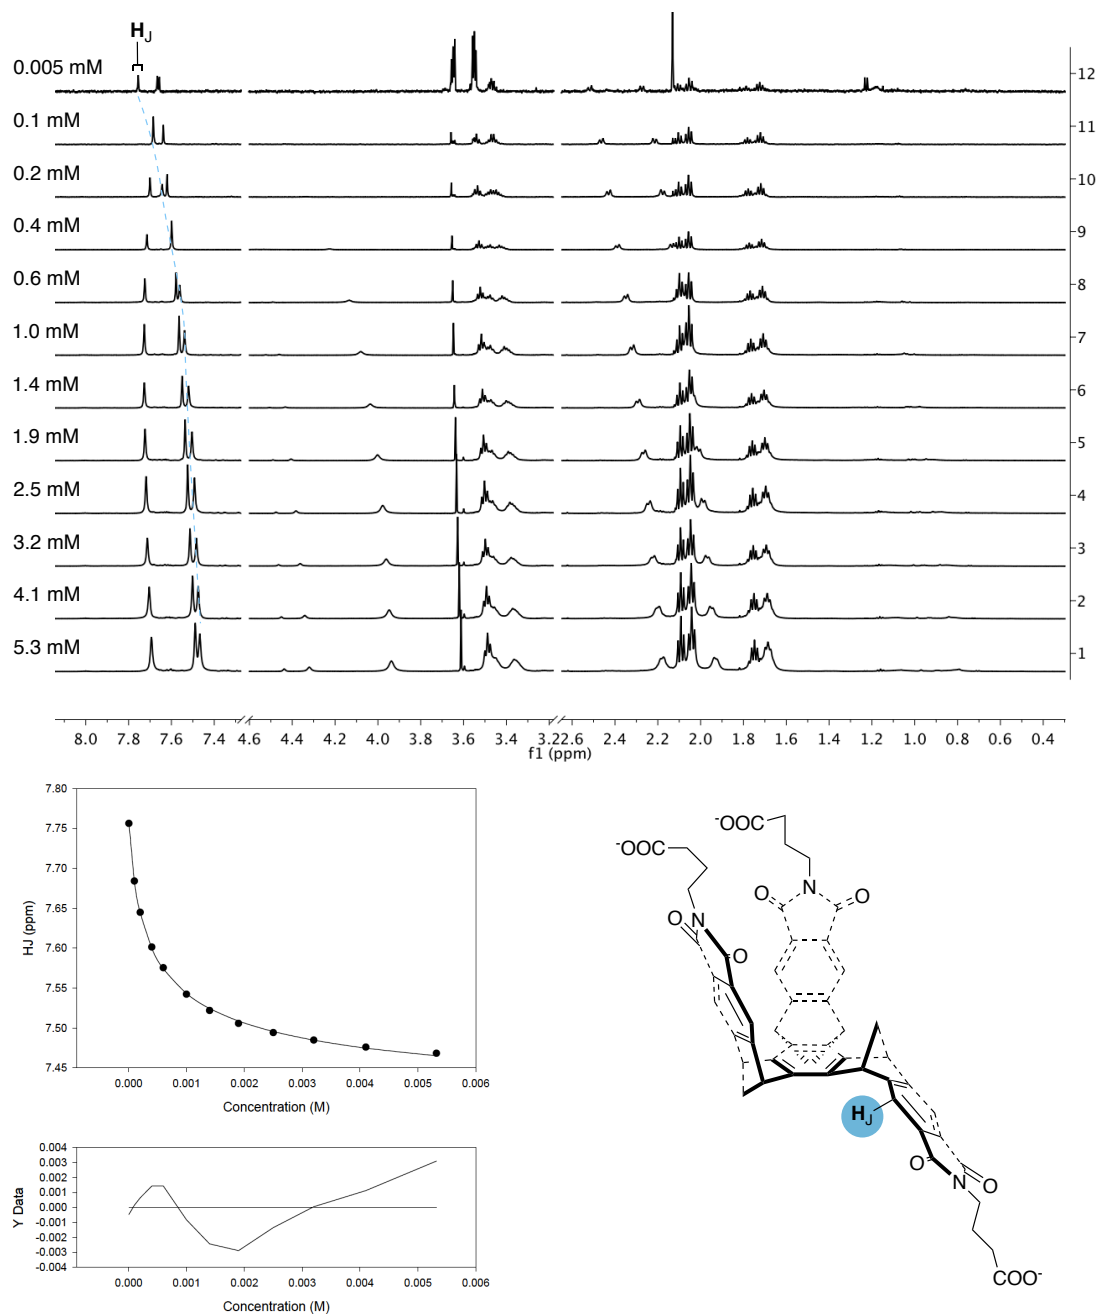

**Figure S20.** (Top)  $^1\text{H}$  NMR spectra (600 MHz, 298 K) of  $[\mathbf{2}_{anti}]^{3-}$  at different concentrations (shown on the left) in 25 mM phosphate buffer at pH = 7.2. (Bottom). Nonlinear least-square analysis of  $^1\text{H}$  NMR binding data corresponding to the formation of homodimer  $[\mathbf{2}_{anti}]_2^{6-}$ . Using the change in chemical shift of  $\text{H}_J$  as a function of the overall concentration of  $[\mathbf{2}_{anti}]^{3-}$  we obtained stability constant  $K_a = 1704 \pm 42 \text{ M}^{-1}$  (SigmaPlot) as an arithmetic mean of two separate measurements with the standard deviation as error. A distribution of residuals is shown at the bottom.

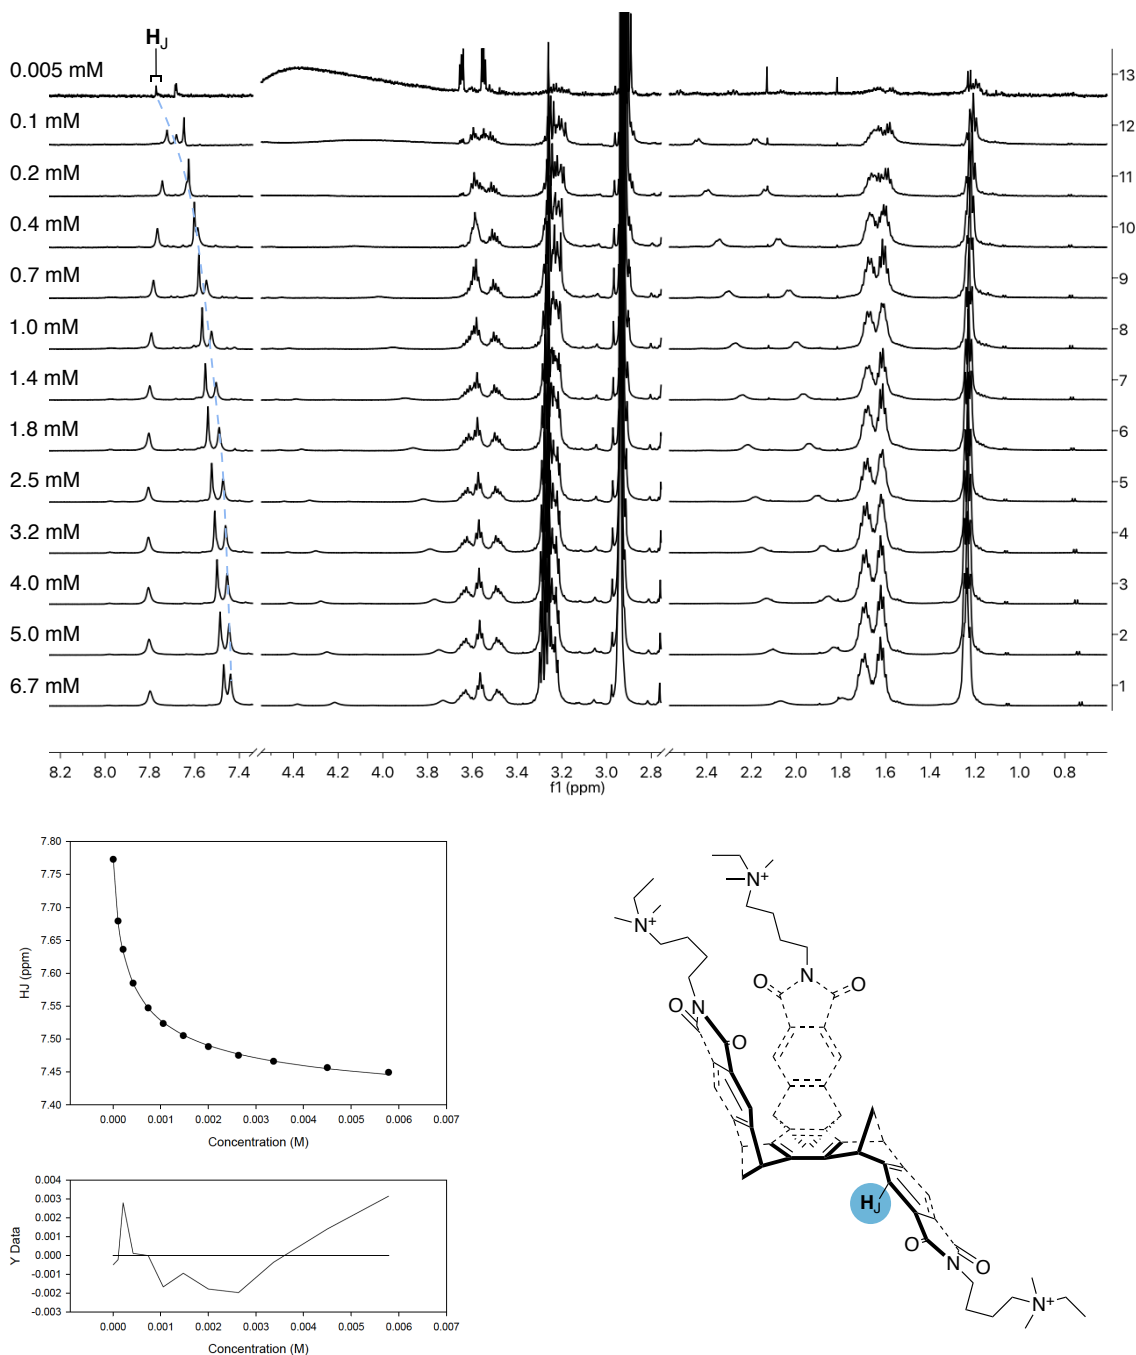

**Figure S21.** (Top)  $^1\text{H}$  NMR spectra (600 MHz, 298 K) of  $[\mathbf{3}_{anti}]^{3+}$  at different concentrations (shown on the left) in 25 mM phosphate buffer at pH = 7.2. (Bottom). Nonlinear least-square analysis of  $^1\text{H}$  NMR binding data corresponding to the formation of homodimer  $[\mathbf{3}_{anti}]_2^{6+}$ . Using the change in chemical shift of  $\text{H}_J$  as a function of the overall concentration of  $[\mathbf{3}_{anti}]^{3+}$  we obtained stability constant  $K_a = 1704 \pm 42 \text{ M}^{-1}$  (SigmaPlot) as an arithmetic mean of two separate measurements with the standard deviation as error. A distribution of residuals is shown at the bottom.

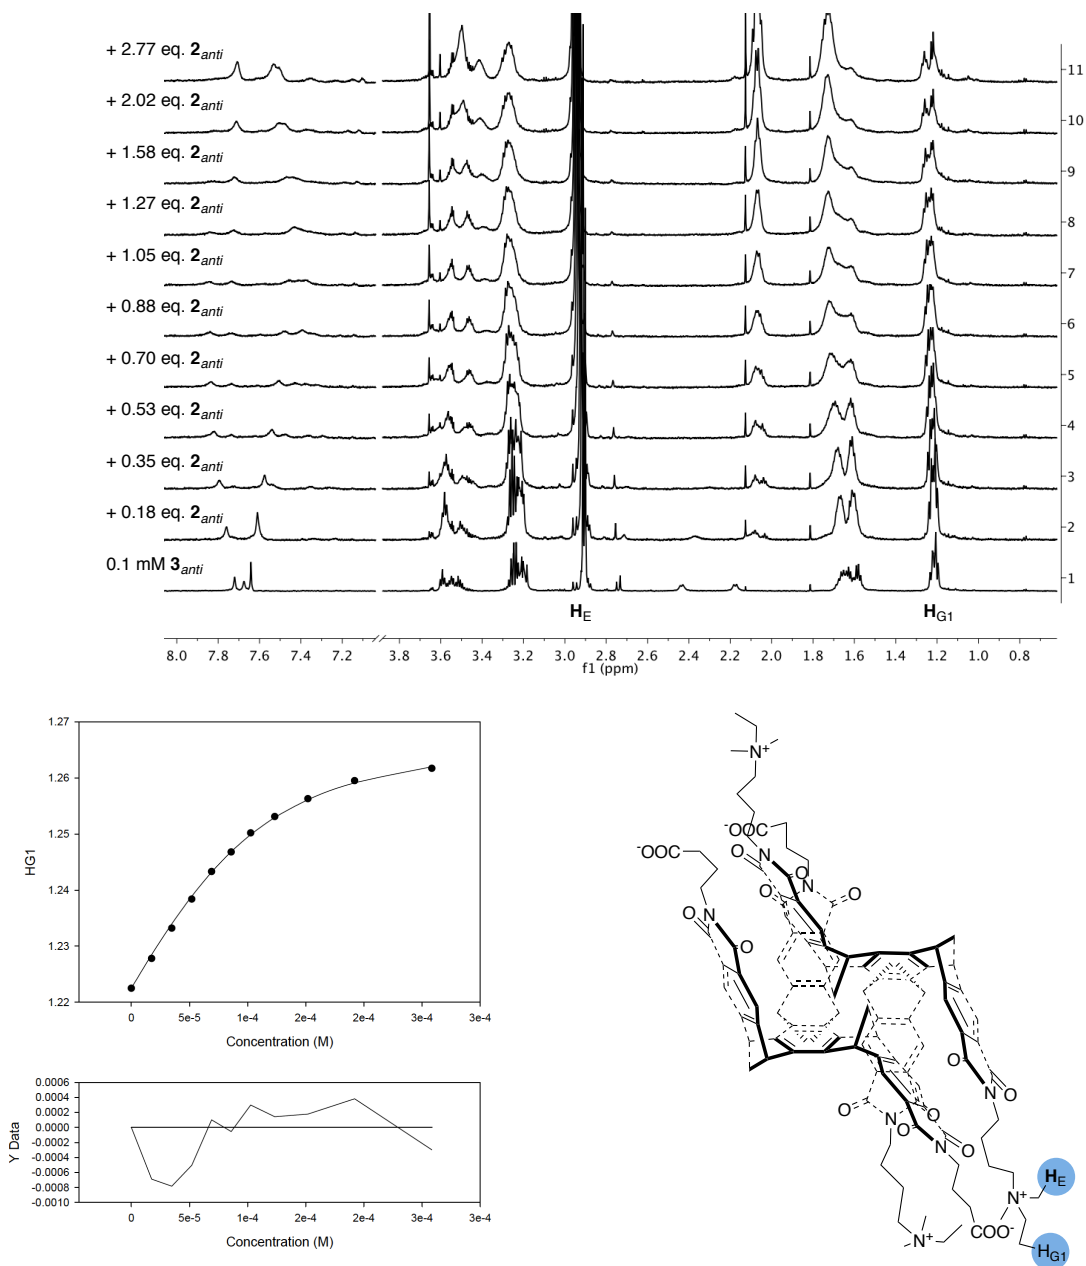

**Figure S22.** (Top)  $^1\text{H}$  NMR spectra (600 MHz, 298 K) of  $0.1 \text{ mM}$  of  $[3_{anti}]^{3+}$  in  $25 \text{ mM}$  phosphate buffer at  $\text{pH} = 7.2$ , obtained upon an incremental addition of  $4.0 \text{ mM}$  solution of  $[2_{anti}]^{3-}$  (Bottom). Nonlinear least-square analysis of  $^1\text{H}$  NMR binding data corresponding to the formation of  $[2_{anti}C3_{anti}]$  (1:1) complex. Using the change in chemical shift of  $H_{G1}$  as a function of the overall concentration of  $[2_{anti}]^{3-}$  we obtained stability constant  $K_a = 3.3 \pm 0.2 \cdot 10^4 \text{ M}^{-1}$  (SigmaPlot) as an arithmetic mean of two separate measurements with the standard deviation as error; note that homodimerization of  $[3_{anti}]^{3+}$  (in addition to  $[2_{anti}]^{3-}$ ) was negligible under the experimental conditions, and therefore not included in the theoretical model. A distribution of residuals is shown at the bottom.

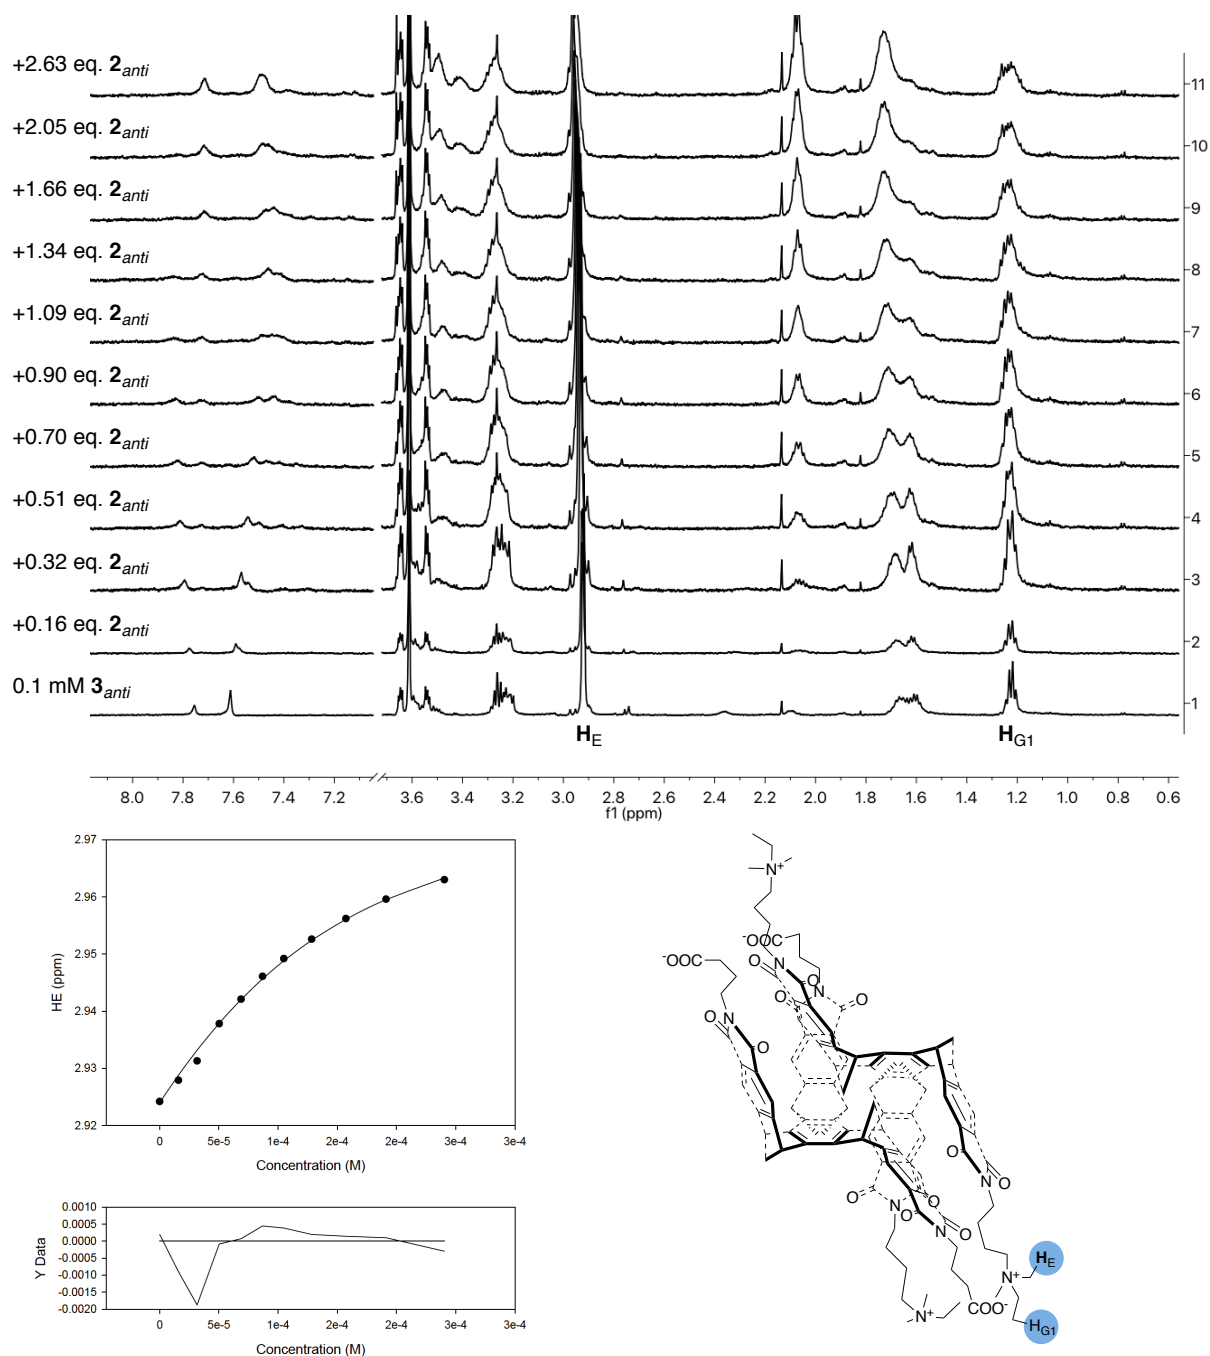

**Figure S23.** (Top)  $^1\text{H}$  NMR spectra (600 MHz, 298 K) of 0.1 mM of  $[\mathbf{3}_{anti}]^{3+}$  in 0.1 M phosphate buffer with 0.1 M NaCl at pH = 7.2, obtained upon an incremental addition of 4.0 mM solution of  $[\mathbf{2}_{anti}]^{3-}$  (Bottom). Nonlinear least-square analysis of  $^1\text{H}$  NMR binding data corresponding to the formation of  $[\mathbf{2}_{anti} \subset \mathbf{3}_{anti}]$  (1:1) complex. Using the change in chemical shift of  $\text{H}_E$  as a function of the overall concentration of  $[\mathbf{2}_{anti}]^{3-}$  we obtained stability constant  $K_a = 1.3 \pm 0.2 \cdot 10^4 \text{ M}^{-1}$  (SigmaPlot) as an arithmetic mean of two separate measurements with the standard deviation as error; note that homodimerization of  $[\mathbf{3}_{anti}]^{3+}$  (in addition to  $[\mathbf{2}_{anti}]^{3-}$ ) was negligible under the experimental conditions, and therefore not included in the theoretical model. A distribution of residuals is shown at the bottom.

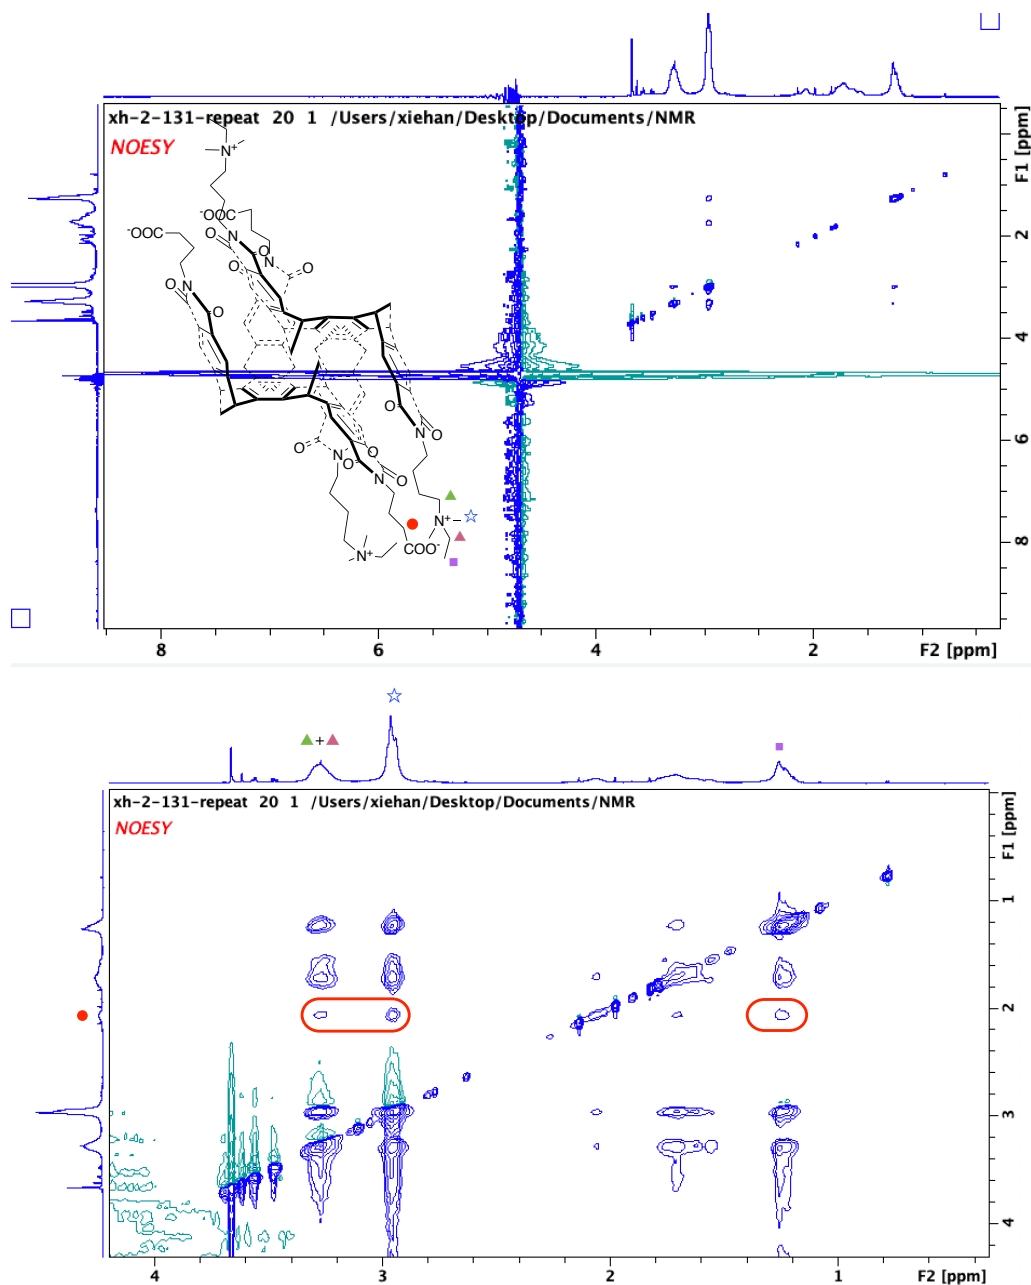

**Figure S24.** Two views of 2D NOESY NMR spectrum (600 MHz, 298 K) of 1.0 mM heterodimer  $[2_{anti}\text{-}3_{anti}]$  ( $\text{H}_2\text{O}:\text{D}_2\text{O} = 9:1$ ) in 25 mM phosphate buffer at pH = 7.2. Intermolecular cross-correlations suggesting the proposed geometry of  $[2_{anti}\text{-}3_{anti}]$  complex are depicted with colored symbols (triangles, circle, star and square).

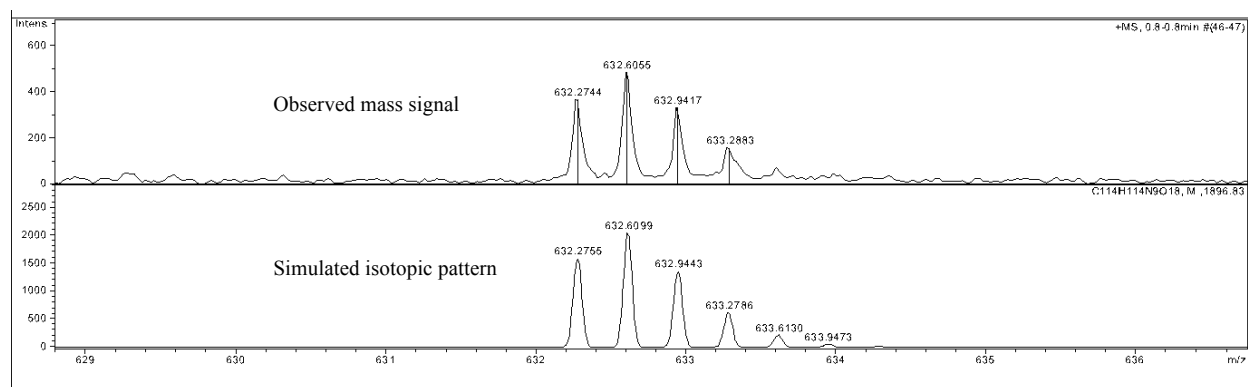

**Figure S25.** Segments of experimental (top) and simulated (bottom) high-resolution ESI-Mass spectra of  $[2_{anti}C3_{anti}]$ , suggesting the formation of  $[2_{anti}C3_{anti}-3Br]^{3+}$  cation with  $m/z$  calcd for  $C_{114}H_{114}N_9O_{18}^{3+}$  632.2755 (bottom) and found 632.2744 (top).



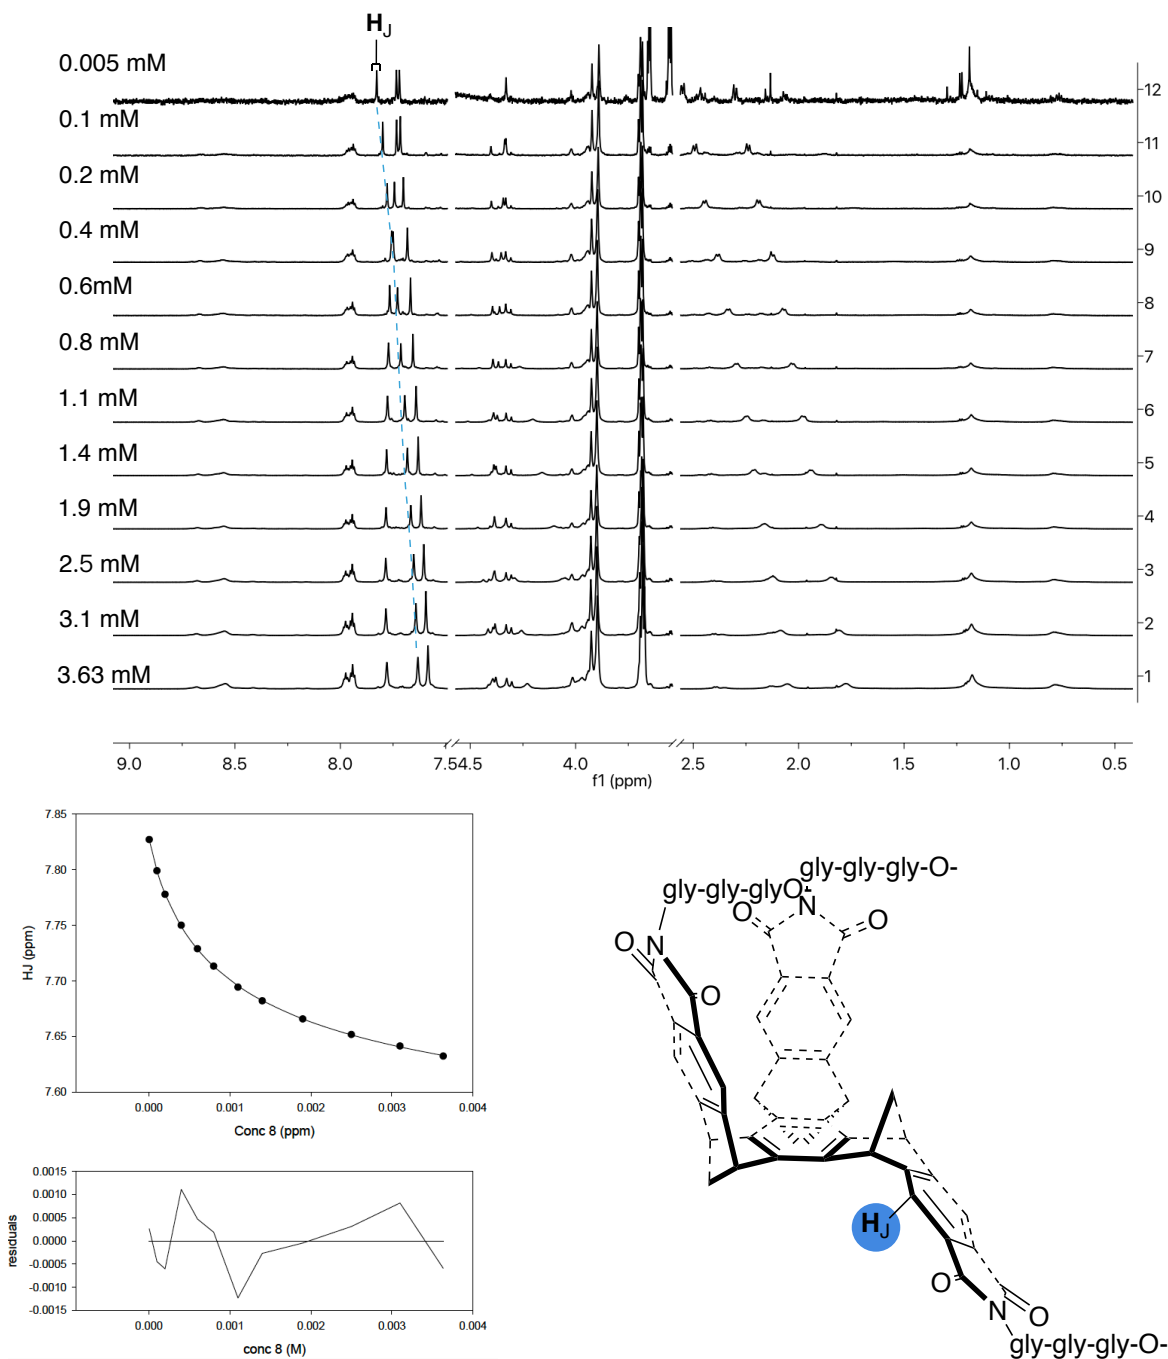

**Figure S26.** (Top)  $^1\text{H}$  NMR spectra (600 MHz, 298 K) of  $[\mathbf{8}_{anti}]^{3-}$  at different concentrations (shown on the left) in 25 mM phosphate buffer at pH = 7.2. (Bottom). Nonlinear least-square analysis of  $^1\text{H}$  NMR binding data corresponding to the formation of homodimer  $[\mathbf{8}_{anti}]_2^{6-}$ . (Bottom) Using the change in chemical shift of  $\text{H}_J$  (ppm) as a function of the overall concentration of  $[\mathbf{8}_{anti}]^{3-}$  we obtained stability constant  $K_a = 510 \pm 55 \text{ M}^{-1}$  (SigmaPlot) as an arithmetic mean of two separate measurements with the standard deviation as error. A random distribution of residuals is shown at the bottom.

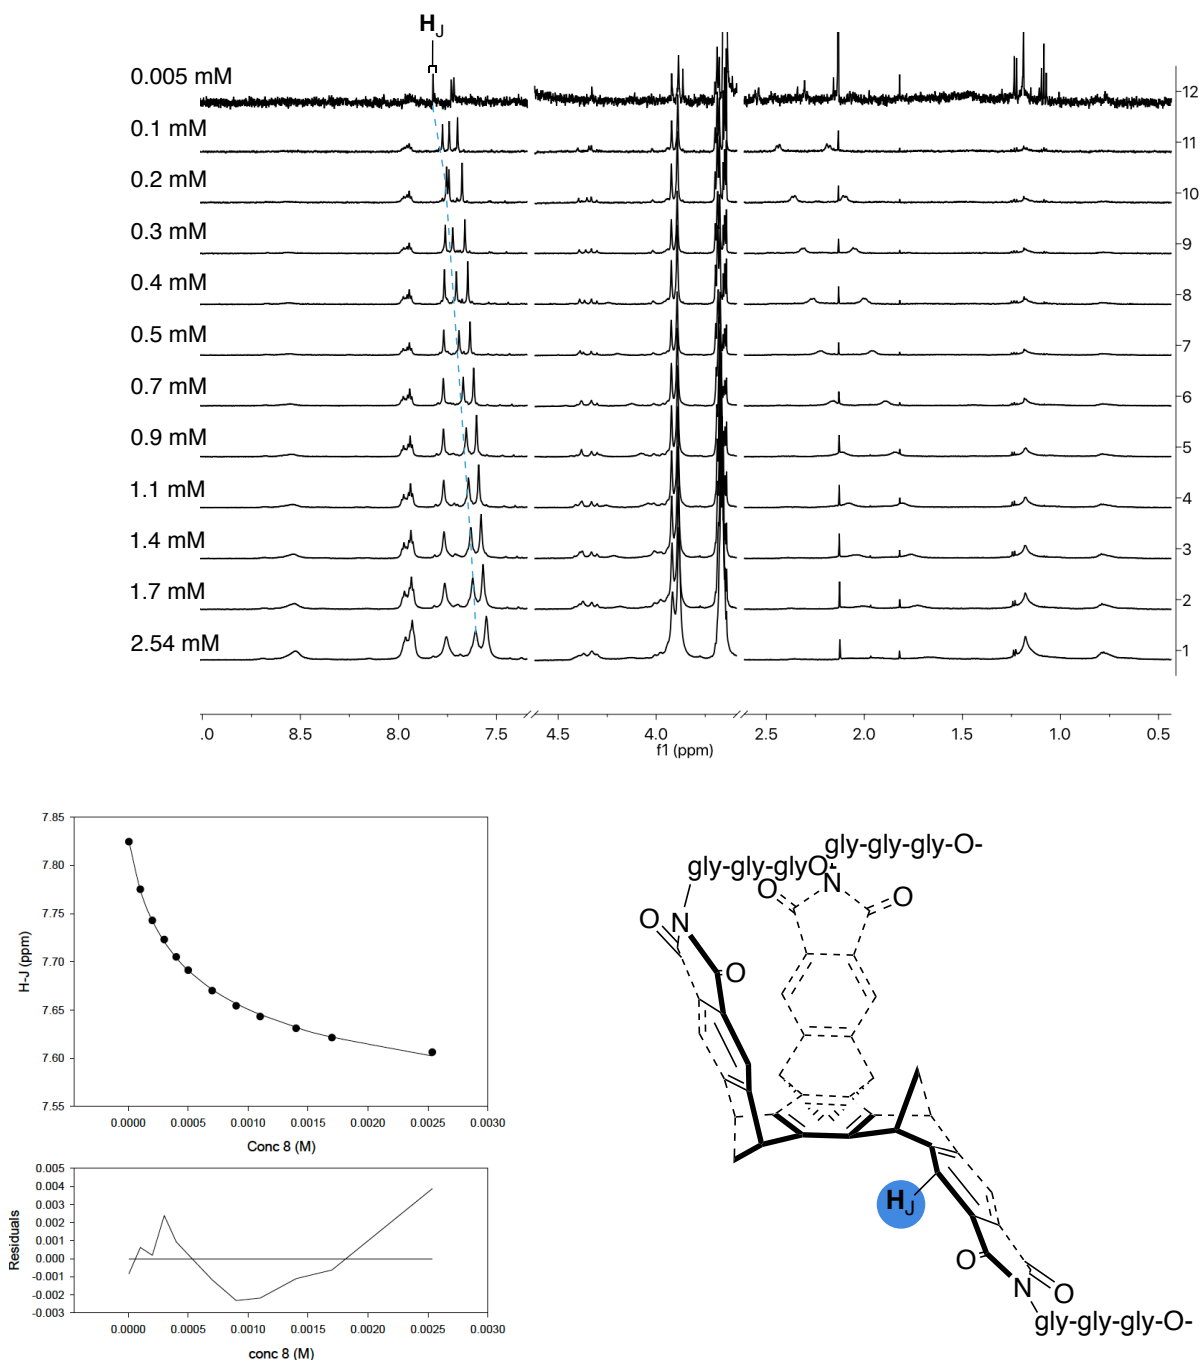

**Figure S27.** (Top)  $^1\text{H}$  NMR spectra (600 MHz, 298 K) of  $[\mathbf{8}_{anti}]^{3-}$  at different concentrations (shown on the left) in 0.1 M phosphate buffer and containing 0.1 M NaCl at pH = 7.2. (Bottom). Nonlinear least-square analysis of  $^1\text{H}$  NMR binding data corresponding to the formation of homodimer  $[\mathbf{8}_{anti}]_2^{6-}$ . (Bottom) Using the change in chemical shift of  $\mathbf{H}_J$  (ppm) as a function of the overall concentration of  $[\mathbf{8}_{anti}]^{3-}$  we obtained stability constant  $K_a = 1314 \pm 270 \text{ M}^{-1}$  (SigmaPlot) as an arithmetic mean of two separate measurements with the standard deviation as error. A random distribution of residuals is shown at the bottom.

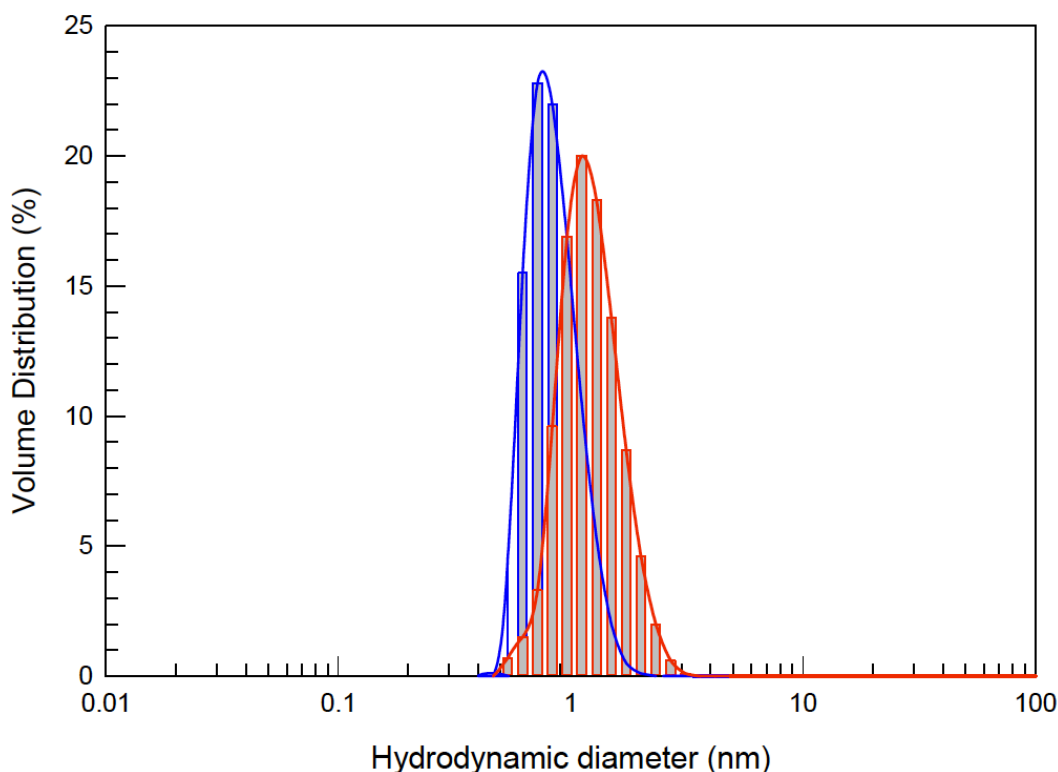

**Figure S28.** The intensity distributions of scattered light as a function of hydrodynamic diameters ( $D_H$ ) were obtained from Dynamic Light Scattering (DLS, 298 K) measurements of 0.5 mM (blue, mean count rate = 23-31 kcps, PDI = 0.335-0.621) and 15.0 mM (red, mean count rate = 140-152 kcps, PDI = 0.409-0.503) solutions of  $[1_{anti}]^{3-}$  in 25 mM phosphate buffer at  $\text{pH} = 7.2 \pm 0.1$ ; all DLS measurements were completed (in triplicate) on a Malvern Zetasizer Nano Z6 instrument in 25 mM phosphate buffer ( $\text{pH} = 7.2 \pm 0.1$ ) that was filtered three times ( $0.22\mu\text{m}$ ) prior to immediate use. Note that, in the first case (0.5 mM solution), the observed distribution of sizes centers at  $D_H = 0.8$  nm while in the case of more concentrated  $[1_{anti}]^{3-}$   $D_H = 1.12$  nm therefore indicating the absence of higher oligomers. The observed mean count rates (ideally from 200-500 kbps) are low while the polydispersity indices (PDI) high making the data less reliable yet informative and in line with other measurements.

## Computational Studies

Monte-Carlo (MC) conformational searches of  $[\mathbf{1}_{anti}]_2^{6-}$ ,  $[\mathbf{2}_{anti}]_2^{6-}$ ,  $[\mathbf{3}_{anti}]_2^{6+}$  and  $[\mathbf{2}_{anti}\mathbf{C}\mathbf{3}_{anti}]$  were each completed with the Maestro suite (Schrodinger) using OPLS3 molecular mechanics (MM) force field in implicit water solvent. For each search, we used systematic torsional sampling method with 100 steps per rotatable bond and 50,000 steps overall. The energy window for saving structures was set to 12 kJ/mol.

For  $[\mathbf{1}_{anti}]_2^{6-}$ , MC/MM search gave 6 “antiparallel” conformers (0-4.0 kJ/mol, shown on the left) and one parallel homodimer (10.7 kJ/mol, shown on the right). The corresponding steric energies

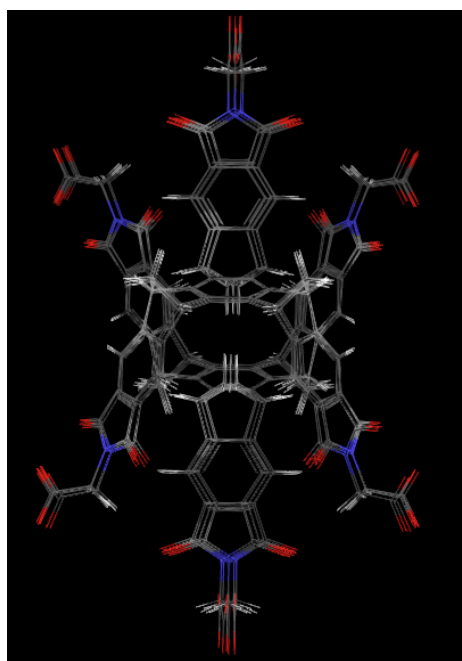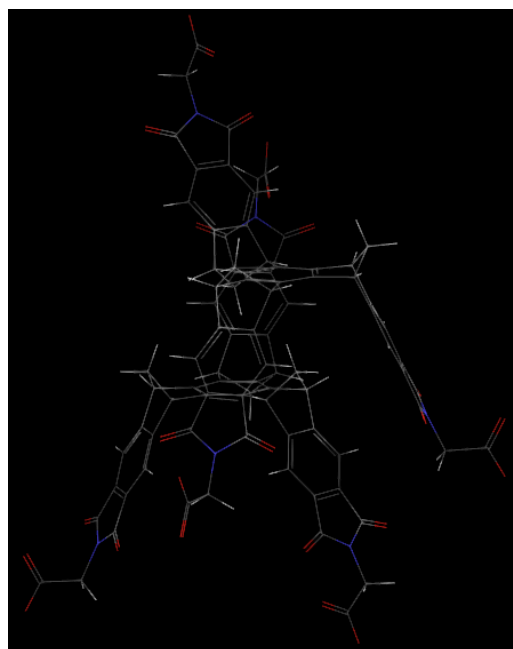

are shown in the table below.

|   |   |            |     |   |             |             |           |       |       |
|---|---|------------|-----|---|-------------|-------------|-----------|-------|-------|
| 2 | ● | Structure1 | ☆☆☆ | 2 | 18 Dec 2... | 18 Dec 2018 | -1788.743 | 0.030 | 0.00  |
| 3 | ● | Structure1 | ☆☆☆ | 3 | 18 Dec 2... | 18 Dec 2018 | -1788.743 | 0.036 | 0.00  |
| 4 | ● | Structure1 | ☆☆☆ | 4 | 18 Dec 2... | 18 Dec 2018 | -1788.336 | 0.046 | 0.40  |
| 5 | ● | Structure1 | ☆☆☆ | 5 | 18 Dec 2... | 18 Dec 2018 | -1786.572 | 0.037 | 2.17  |
| 6 | ● | Structure1 | ☆☆☆ | 6 | 18 Dec 2... | 18 Dec 2018 | -1786.569 | 0.044 | 2.17  |
| 7 | ● | Structure1 | ☆☆☆ | 7 | 18 Dec 2... | 18 Dec 2018 | -1784.681 | 0.047 | 4.00  |
| 8 | ● | Structure1 | ☆☆☆ | 8 | 18 Dec 2... | 18 Dec 2018 | -1778.029 | 0.045 | 10.71 |

For  $[2_{anti}]_2^{6-}$ , MC/MM search gave 3 conformers (0-5.97 kJ/mol, below left) and one (6.36 kJ/mol, below right) populating the equilibrium. The corresponding steric energies are shown in the table below.

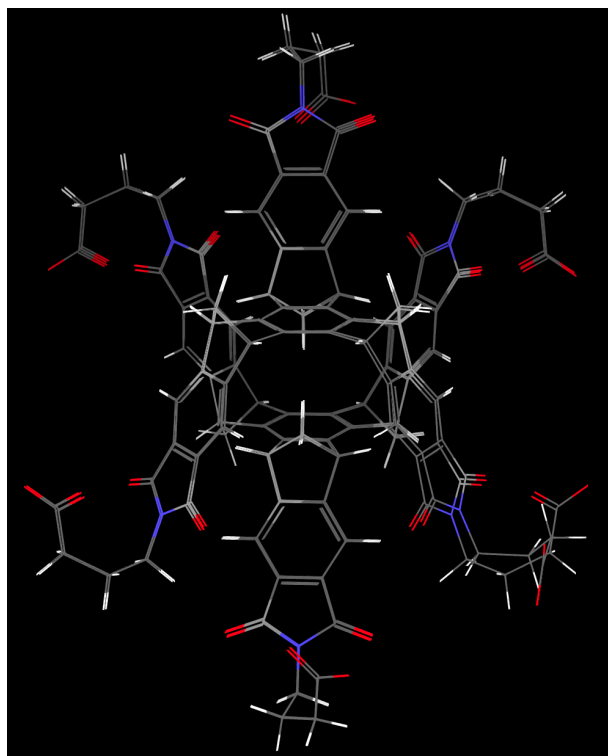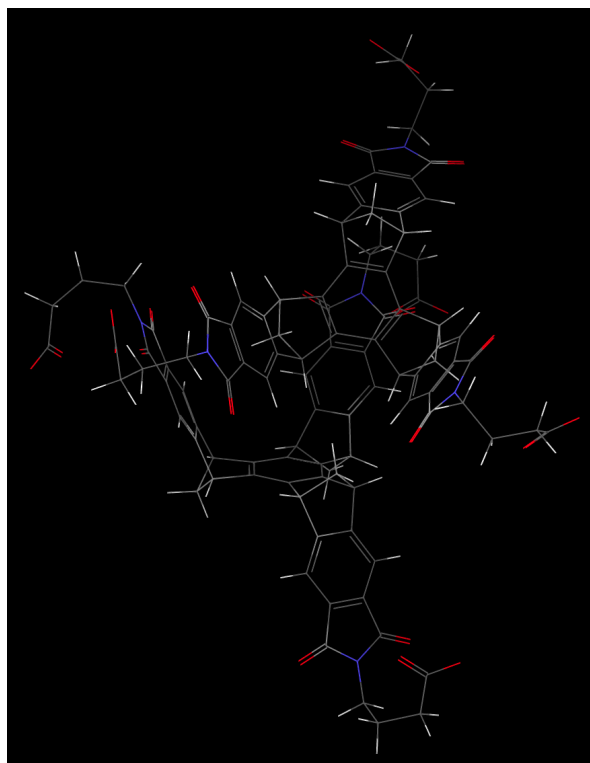

|   |   |            |     |   |             |             |           |       |      |
|---|---|------------|-----|---|-------------|-------------|-----------|-------|------|
| 2 | ● | Structure1 | ☆☆☆ | 2 | 18 Dec 2... | 24 Dec 2018 | -1888.810 | 0.044 | 0.0  |
| 3 | ○ | Structure1 | ☆☆☆ | 3 | 18 Dec 2... | 18 Dec 2018 | -1885.553 | 0.049 | 3.2  |
| 4 | ○ | Structure1 | ☆☆☆ | 5 | 18 Dec 2... | 18 Dec 2018 | -1882.448 | 0.035 | 6.3  |
| 5 | ○ | Structure1 | ☆☆☆ | 4 | 18 Dec 2... | 18 Dec 2018 | -1882.842 | 0.048 | 5.9  |
| 6 | ○ | Structure1 | ☆☆☆ | 6 | 18 Dec 2... | 18 Dec 2018 | -1877.208 | 0.050 | 11.6 |

For  $[\mathbf{3}_{anti}]_2^{6+}$ , MC/MM search gave 31 conformers (0-6.3 kJ/mol, shown below) populating the equilibrium. The corresponding steric energies are shown in the table below.

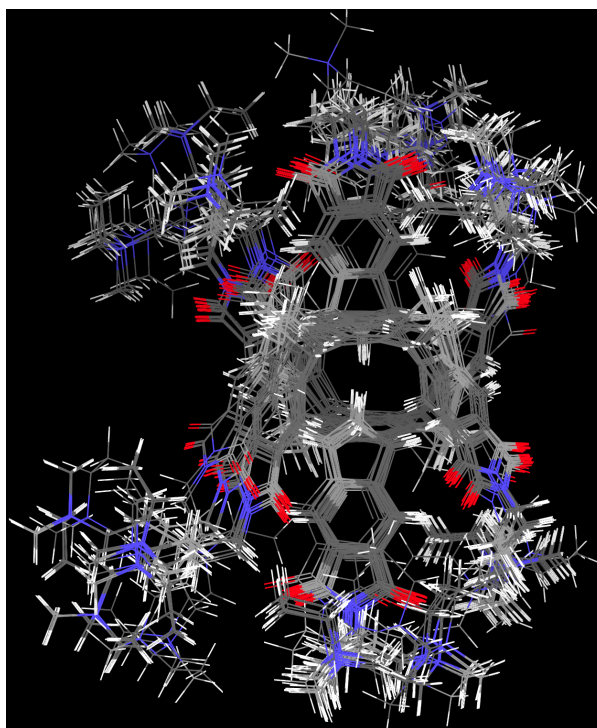

|    |   |            |      |    |             |             |         |       |       |
|----|---|------------|------|----|-------------|-------------|---------|-------|-------|
| 2  | ● | Structure1 | ☆☆☆☆ | 2  | 28 Dec 2... | 28 Dec 2018 | 211.299 | 0.049 | 0.000 |
| 3  | ● | Structure1 | ☆☆☆☆ | 3  | 28 Dec 2... | 28 Dec 2018 | 211.459 | 0.049 | 0.159 |
| 4  | ● | Structure1 | ☆☆☆☆ | 4  | 28 Dec 2... | 28 Dec 2018 | 212.626 | 0.044 | 1.326 |
| 5  | ● | Structure1 | ☆☆☆☆ | 5  | 28 Dec 2... | 28 Dec 2018 | 212.775 | 0.049 | 1.476 |
| 6  | ● | Structure1 | ☆☆☆☆ | 6  | 28 Dec 2... | 28 Dec 2018 | 213.070 | 0.037 | 1.771 |
| 7  | ● | Structure1 | ☆☆☆☆ | 7  | 28 Dec 2... | 28 Dec 2018 | 214.065 | 0.041 | 2.766 |
| 8  | ● | Structure1 | ☆☆☆☆ | 8  | 28 Dec 2... | 28 Dec 2018 | 214.223 | 0.046 | 2.924 |
| 9  | ● | Structure1 | ☆☆☆☆ | 9  | 28 Dec 2... | 28 Dec 2018 | 214.250 | 0.048 | 2.951 |
| 10 | ● | Structure1 | ☆☆☆☆ | 10 | 28 Dec 2... | 28 Dec 2018 | 215.090 | 0.045 | 3.790 |
| 11 | ● | Structure1 | ☆☆☆☆ | 11 | 28 Dec 2... | 28 Dec 2018 | 215.254 | 0.049 | 3.955 |
| 12 | ● | Structure1 | ☆☆☆☆ | 12 | 28 Dec 2... | 28 Dec 2018 | 215.500 | 0.049 | 4.201 |
| 13 | ● | Structure1 | ☆☆☆☆ | 13 | 28 Dec 2... | 28 Dec 2018 | 215.513 | 0.048 | 4.213 |
| 14 | ● | Structure1 | ☆☆☆☆ | 14 | 28 Dec 2... | 28 Dec 2018 | 215.515 | 0.048 | 4.216 |
| 15 | ● | Structure1 | ☆☆☆☆ | 15 | 28 Dec 2... | 28 Dec 2018 | 215.613 | 0.043 | 4.314 |
| 16 | ● | Structure1 | ☆☆☆☆ | 16 | 28 Dec 2... | 28 Dec 2018 | 215.673 | 0.039 | 4.373 |
| 17 | ● | Structure1 | ☆☆☆☆ | 17 | 28 Dec 2... | 28 Dec 2018 | 215.681 | 0.048 | 4.382 |
| 18 | ● | Structure1 | ☆☆☆☆ | 18 | 28 Dec 2... | 28 Dec 2018 | 216.030 | 0.044 | 4.731 |
| 19 | ● | Structure1 | ☆☆☆☆ | 19 | 28 Dec 2... | 28 Dec 2018 | 216.110 | 0.048 | 4.810 |
| 20 | ● | Structure1 | ☆☆☆☆ | 20 | 28 Dec 2... | 28 Dec 2018 | 216.113 | 0.049 | 4.814 |
| 21 | ● | Structure1 | ☆☆☆☆ | 21 | 28 Dec 2... | 28 Dec 2018 | 216.652 | 0.048 | 5.352 |
| 22 | ● | Structure1 | ☆☆☆☆ | 22 | 28 Dec 2... | 28 Dec 2018 | 216.770 | 0.046 | 5.471 |
| 23 | ● | Structure1 | ☆☆☆☆ | 23 | 28 Dec 2... | 28 Dec 2018 | 216.989 | 0.045 | 5.690 |
| 24 | ● | Structure1 | ☆☆☆☆ | 24 | 28 Dec 2... | 28 Dec 2018 | 217.077 | 0.049 | 5.777 |
| 25 | ● | Structure1 | ☆☆☆☆ | 25 | 28 Dec 2... | 28 Dec 2018 | 217.081 | 0.043 | 5.782 |
| 26 | ● | Structure1 | ☆☆☆☆ | 26 | 28 Dec 2... | 28 Dec 2018 | 217.136 | 0.048 | 5.836 |
| 27 | ● | Structure1 | ☆☆☆☆ | 27 | 28 Dec 2... | 28 Dec 2018 | 217.153 | 0.049 | 5.853 |
| 28 | ● | Structure1 | ☆☆☆☆ | 28 | 28 Dec 2... | 28 Dec 2018 | 217.216 | 0.041 | 5.917 |
| 29 | ● | Structure1 | ☆☆☆☆ | 29 | 28 Dec 2... | 28 Dec 2018 | 217.217 | 0.049 | 5.918 |
| 30 | ● | Structure1 | ☆☆☆☆ | 30 | 28 Dec 2... | 28 Dec 2018 | 217.298 | 0.045 | 5.999 |
| 31 | ● | Structure1 | ☆☆☆☆ | 31 | 28 Dec 2... | 28 Dec 2018 | 217.426 | 0.047 | 6.126 |
| 32 | ● | Structure1 | ☆☆☆☆ | 32 | 28 Dec 2... | 28 Dec 2018 | 217.510 | 0.044 | 6.210 |
| 33 | ● | Structure1 | ☆☆☆☆ | 33 | 28 Dec 2... | 28 Dec 2018 | 217.556 | 0.045 | 6.257 |

For [**2<sub>anti</sub>**–**3<sub>anti</sub>**], the MC/MM search gave 61 conformers (0-6.3 kJ/mol, shown below) populating the equilibrium. Steric energies of most stable 30 conformers are shown in the table below.

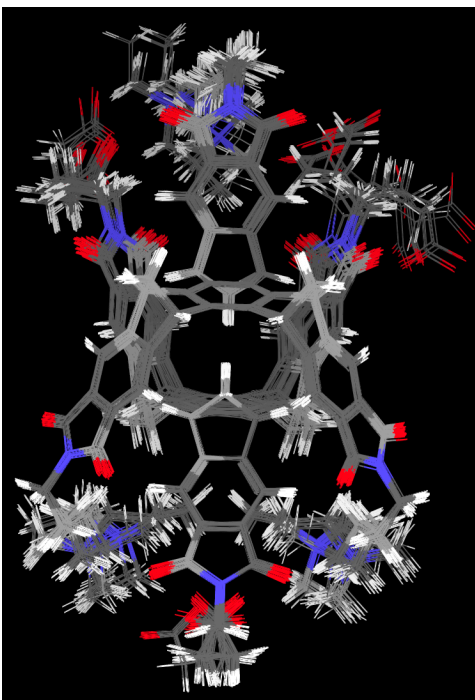

|    |                                  |                            |     |    |             |             |          |       |       |
|----|----------------------------------|----------------------------|-----|----|-------------|-------------|----------|-------|-------|
| 1  | <input type="radio"/>            | Structure1                 | ☆☆☆ | 1  | 28 Dec 2... | 28 Dec 2018 |          |       |       |
| 1  | <input checked="" type="radio"/> | mmod_csearch_90-out1 (503) |     |    |             |             |          |       |       |
| 2  | <input checked="" type="radio"/> | Structure1                 | ☆☆☆ | 2  | 29 Dec 2... | 29 Dec 2018 | -911.089 | 0.048 | 0.000 |
| 3  | <input type="radio"/>            | Structure1                 | ☆☆☆ | 3  | 29 Dec 2... | 29 Dec 2018 | -910.220 | 0.047 | 0.869 |
| 4  | <input type="radio"/>            | Structure1                 | ☆☆☆ | 4  | 29 Dec 2... | 29 Dec 2018 | -909.826 | 0.045 | 1.263 |
| 5  | <input type="radio"/>            | Structure1                 | ☆☆☆ | 5  | 29 Dec 2... | 29 Dec 2018 | -909.104 | 0.047 | 1.985 |
| 6  | <input type="radio"/>            | Structure1                 | ☆☆☆ | 6  | 29 Dec 2... | 29 Dec 2018 | -908.366 | 0.045 | 2.723 |
| 7  | <input type="radio"/>            | Structure1                 | ☆☆☆ | 7  | 29 Dec 2... | 29 Dec 2018 | -908.309 | 0.050 | 2.780 |
| 8  | <input type="radio"/>            | Structure1                 | ☆☆☆ | 8  | 29 Dec 2... | 29 Dec 2018 | -908.172 | 0.040 | 2.917 |
| 9  | <input type="radio"/>            | Structure1                 | ☆☆☆ | 9  | 29 Dec 2... | 29 Dec 2018 | -908.030 | 0.046 | 3.059 |
| 10 | <input type="radio"/>            | Structure1                 | ☆☆☆ | 10 | 29 Dec 2... | 29 Dec 2018 | -907.751 | 0.043 | 3.338 |
| 11 | <input type="radio"/>            | Structure1                 | ☆☆☆ | 11 | 29 Dec 2... | 29 Dec 2018 | -907.556 | 0.042 | 3.533 |
| 12 | <input type="radio"/>            | Structure1                 | ☆☆☆ | 12 | 29 Dec 2... | 29 Dec 2018 | -907.508 | 0.028 | 3.581 |
| 13 | <input type="radio"/>            | Structure1                 | ☆☆☆ | 13 | 29 Dec 2... | 29 Dec 2018 | -907.489 | 0.049 | 3.600 |
| 14 | <input type="radio"/>            | Structure1                 | ☆☆☆ | 14 | 29 Dec 2... | 29 Dec 2018 | -907.484 | 0.046 | 3.605 |
| 15 | <input type="radio"/>            | Structure1                 | ☆☆☆ | 15 | 29 Dec 2... | 29 Dec 2018 | -907.330 | 0.046 | 3.759 |
| 16 | <input type="radio"/>            | Structure1                 | ☆☆☆ | 16 | 29 Dec 2... | 29 Dec 2018 | -907.264 | 0.045 | 3.825 |
| 17 | <input type="radio"/>            | Structure1                 | ☆☆☆ | 17 | 29 Dec 2... | 29 Dec 2018 | -907.244 | 0.028 | 3.845 |
| 18 | <input type="radio"/>            | Structure1                 | ☆☆☆ | 18 | 29 Dec 2... | 29 Dec 2018 | -907.113 | 0.045 | 3.976 |
| 19 | <input type="radio"/>            | Structure1                 | ☆☆☆ | 19 | 29 Dec 2... | 29 Dec 2018 | -907.070 | 0.042 | 4.019 |
| 20 | <input type="radio"/>            | Structure1                 | ☆☆☆ | 20 | 29 Dec 2... | 29 Dec 2018 | -906.831 | 0.035 | 4.258 |
| 21 | <input type="radio"/>            | Structure1                 | ☆☆☆ | 21 | 29 Dec 2... | 29 Dec 2018 | -906.754 | 0.045 | 4.335 |
| 22 | <input type="radio"/>            | Structure1                 | ☆☆☆ | 22 | 29 Dec 2... | 29 Dec 2018 | -906.696 | 0.050 | 4.393 |
| 23 | <input type="radio"/>            | Structure1                 | ☆☆☆ | 23 | 29 Dec 2... | 29 Dec 2018 | -906.678 | 0.024 | 4.411 |
| 24 | <input type="radio"/>            | Structure1                 | ☆☆☆ | 24 | 29 Dec 2... | 29 Dec 2018 | -906.595 | 0.046 | 4.494 |
| 25 | <input type="radio"/>            | Structure1                 | ☆☆☆ | 25 | 29 Dec 2... | 29 Dec 2018 | -906.569 | 0.048 | 4.520 |
| 26 | <input type="radio"/>            | Structure1                 | ☆☆☆ | 26 | 29 Dec 2... | 29 Dec 2018 | -906.560 | 0.046 | 4.529 |
| 27 | <input type="radio"/>            | Structure1                 | ☆☆☆ | 27 | 29 Dec 2... | 29 Dec 2018 | -906.436 | 0.049 | 4.653 |
| 28 | <input type="radio"/>            | Structure1                 | ☆☆☆ | 28 | 29 Dec 2... | 29 Dec 2018 | -906.306 | 0.042 | 4.783 |
| 29 | <input type="radio"/>            | Structure1                 | ☆☆☆ | 29 | 29 Dec 2... | 29 Dec 2018 | -906.226 | 0.047 | 4.863 |
| 30 | <input type="radio"/>            | Structure1                 | ☆☆☆ | 30 | 29 Dec 2... | 29 Dec 2018 | -906.133 | 0.038 | 4.956 |
| 31 | <input type="radio"/>            | Structure1                 | ☆☆☆ | 31 | 29 Dec 2... | 29 Dec 2018 | -906.102 | 0.046 | 4.987 |



Structural optimization of methyl ester of [**1<sub>anti</sub>**]<sub>2</sub> was (in vacuum) completed at B3LYP/6-31G\* level of theory (DFT) with the Spartan software; the starting structure was obtained from MMFF optimization. Two views of the computed structure of the homodimer are shown below.

MacSPARTAN '16 MECHANICS PROGRAM: (x86/Darwin) build 2.0.7

#### Frequency Calculation

Adjusted 35 (out of 576) low frequency modes

Reason for exit: Successful completion  
Mechanics CPU Time : 1.63  
Mechanics Wall Time: 2.67

MacSPARTAN '16 Quantum Mechanics Program: (x86/Darwin) build 2.0.7

Job type: Geometry optimization.  
Method: RB3LYP  
Basis set: 6-31G(D)  
Number of basis functions: 2022  
Number of electrons: 876  
Parallel Job: 6 threads

SCF model:  
A restricted hybrid HF-DFT SCF calculation will be performed using Pulay DIIS + Geometric Direct Minimization

#### Optimization:

| Step | Energy       | Max Grad. | Max Dist. |
|------|--------------|-----------|-----------|
| 1    | -5832.001515 | 0.039331  | 0.063350  |
| 2    | -5832.046258 | 0.020375  | 0.063010  |
| 3    | -5832.066348 | 0.013149  | 0.074110  |
| 4    | -5832.074538 | 0.011015  | 0.075664  |
| 5    | -5832.077092 | 0.008482  | 0.075818  |
| 6    | -5832.077657 | 0.005029  | 0.111500  |
| 7    | -5832.078246 | 0.004004  | 0.077181  |
| 8    | -5832.078680 | 0.005683  | 0.043544  |
| 9    | -5832.078882 | 0.005958  | 0.037149  |
| 10   | -5832.078992 | 0.005116  | 0.094314  |
| 11   | -5832.079107 | 0.004306  | 0.082788  |
| 12   | -5832.079231 | 0.005787  | 0.047738  |
| 13   | -5832.079407 | 0.013498  | 0.028207  |
| 14   | -5832.079504 | 0.004215  | 0.047696  |
| 15   | -5832.079559 | 0.003818  | 0.065315  |
| 16   | -5832.079631 | 0.002654  | 0.091446  |
| 17   | -5832.079708 | 0.004406  | 0.089149  |
| 18   | -5832.079769 | 0.003534  | 0.077581  |
| 19   | -5832.079840 | 0.004088  | 0.065816  |
| 20   | -5832.080010 | 0.007510  | 0.085796  |
| 21   | -5832.080465 | 0.017698  | 0.089469  |
| 22   | -5832.080902 | 0.022792  | 0.071690  |
| 23   | -5832.076917 | 0.185886  | 0.045344  |
| 24   | -5832.081056 | 0.042878  | 0.053287  |
| 25   | -5832.080671 | 0.038782  | 0.117974  |
| 26   | -5832.081778 | 0.008573  | 0.067847  |
| 27   | -5832.081891 | 0.013246  | 0.061466  |
| 28   | -5832.081969 | 0.008968  | 0.058349  |
| 29   | -5832.082008 | 0.006609  | 0.035567  |
| 30   | -5832.082099 | 0.004333  | 0.012541  |
| 31   | -5832.082101 | 0.003193  | 0.011180  |
| 32   | -5832.082115 | 0.002533  | 0.012936  |
| 33   | -5832.082131 | 0.001420  | 0.011009  |
| 34   | -5832.082138 | 0.001074  | 0.008685  |
| 35   | -5832.082151 | 0.000989  | 0.011258  |
| 36   | -5832.082153 | 0.001797  | 0.014480  |
| 37   | -5832.082179 | 0.002037  | 0.019899  |
| 38   | -5832.082179 | 0.001290  | 0.019843  |
| 39   | -5832.082187 | 0.000713  | 0.014445  |
| 40   | -5832.082178 | 0.000591  | 0.013517  |
| 41   | -5832.082175 | 0.000615  | 0.013440  |
| 42   | -5832.082195 | 0.001158  | 0.012560  |
| 43   | -5832.082205 | 0.001169  | 0.014173  |
| 44   | -5832.082214 | 0.000966  | 0.022511  |
| 45   | -5832.082223 | 0.000928  | 0.020468  |
| 46   | -5832.082223 | 0.000967  | 0.065113  |
| 47   | -5832.082232 | 0.001360  | 0.054659  |
| 48   | -5832.082261 | 0.001929  | 0.024287  |
| 49   | -5832.082272 | 0.003965  | 0.015652  |
| 50   | -5832.082286 | 0.001665  | 0.017290  |
| 51   | -5832.082294 | 0.001233  | 0.009421  |
| 52   | -5832.082307 | 0.000752  | 0.037633  |
| 53   | -5832.082340 | 0.000996  | 0.059234  |
| 54   | -5832.082389 | 0.002088  | 0.131234  |
| 55   | -5832.079920 | 0.101057  | 0.114089  |
| 56   | -5832.082391 | 0.005647  | 0.104832  |
| 57   | -5832.082431 | 0.002492  | 0.080983  |
| 58   | -5832.082176 | 0.014616  | 0.039336  |
| 59   | -5832.082508 | 0.000624  | 0.021826  |
| 60   | -5832.082518 | 0.001228  | 0.011766  |
| 61   | -5832.082528 | 0.001405  | 0.024226  |
| 62   | -5832.082549 | 0.002425  | 0.011756  |
| 63   | -5832.082550 | 0.000787  | 0.047019  |
| 64   | -5832.082558 | 0.002320  | 0.017555  |
| 65   | -5832.082561 | 0.000628  | 0.012507  |
| 66   | -5832.082566 | 0.000952  | 0.024088  |
| 67   | -5832.082572 | 0.000543  | 0.003721  |
| 68   | -5832.082579 | 0.000550  | 0.004891  |
| 69   | -5832.082579 | 0.000136  | 0.002147  |

Reason for exit: Successful completion  
Quantum Calculation CPU Time : 79:19:53.24  
Quantum Calculation Wall Time: 15:13:02.91

MacSPARTAN '16 Properties Program: (x86/Darwin) build 2.0.7

Reason for exit: Successful completion  
Properties CPU Time : 3:39.37  
Properties Wall Time: 3:40.85

MacSPARTAN '16 MECHANICS PROGRAM: (x86/Darwin) build 2.0.7

|            |                                                                  |
|------------|------------------------------------------------------------------|
| Name:      |                                                                  |
| Formula:   | 2C <sub>48</sub> H <sub>133</sub> N <sub>5</sub> O <sub>12</sub> |
| Job type:  | Geometry optimization                                            |
| Method:    | B3LYP                                                            |
| Basis set: | 6-31G*                                                           |
| Charge:    | neutral                                                          |
| Energy:    | -5832.082579 hartrees                                            |

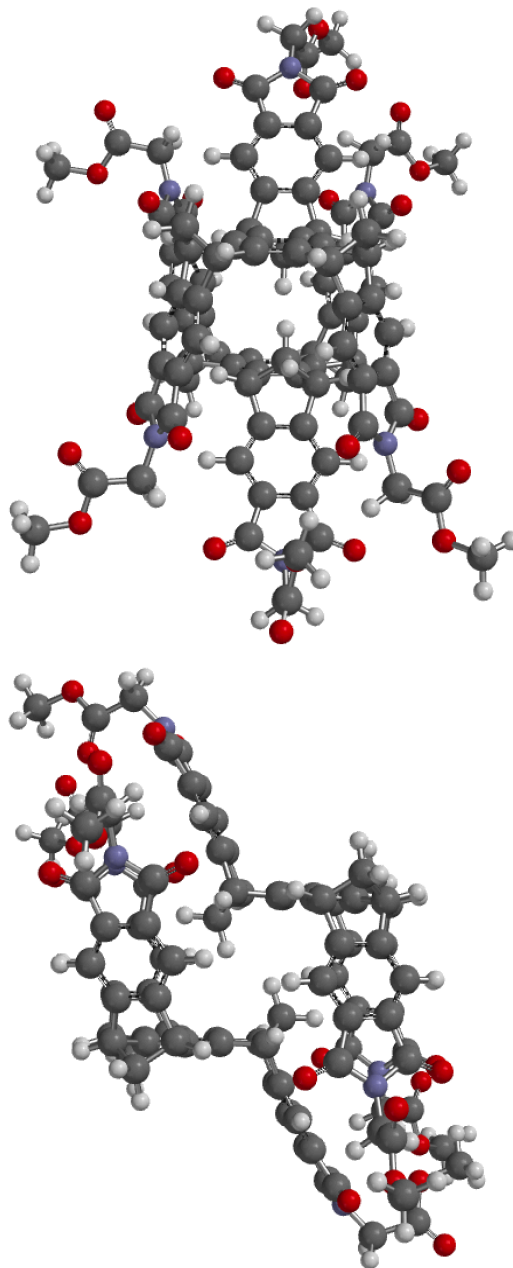



## X-Ray Diffraction Data

Note that we used the SQUEEZE program to remove the contribution of a disordered acetonitrile molecule from the structure factor list (see Spek, A. L. (2015). Acta Cryst. C71, 9–18).

**Table S1.** Crystallographic details for **1<sub>anti</sub>**.

|                                   |                                                                                           |                |
|-----------------------------------|-------------------------------------------------------------------------------------------|----------------|
| Formula                           | C <sub>45</sub> H <sub>27</sub> N <sub>3</sub> O <sub>12</sub> + 6.2 (CH <sub>3</sub> CN) |                |
| Formula weight                    | 1056.25                                                                                   |                |
| Temperature                       | 150(2) K                                                                                  |                |
| Wavelength                        | 0.71073 Å                                                                                 |                |
| Crystal system                    | Triclinic                                                                                 |                |
| Space group                       | P -1                                                                                      |                |
| Unit cell dimensions              | a = 8.3179(6) Å                                                                           | ∠ = 93.773(3)° |
|                                   | b = 17.1721(13) Å                                                                         | ∠ = 91.789(3)° |
|                                   | c = 19.0317(14) Å                                                                         | ∠ = 96.639(3)° |
| Volume                            | 2692.3(3) Å <sup>3</sup>                                                                  |                |
| Z                                 | 2                                                                                         |                |
| Density (calculated)              | 1.303 Mg/m <sup>3</sup>                                                                   |                |
| Absorption coefficient            | 0.094 mm <sup>-1</sup>                                                                    |                |
| F(000)                            | 1100.8                                                                                    |                |
| Crystal size                      | 0.35 x 0.38 x 0.46 mm <sup>3</sup>                                                        |                |
| Theta range for data collection   | 2.729 to 25.027°                                                                          |                |
| Index ranges                      | -9 ≤ h ≤ 9, -20 ≤ k ≤ 20, -22 ≤ l ≤ 22                                                    |                |
| Reflections collected             | 86712                                                                                     |                |
| Independent reflections           | 9258 [R(int) = 0.0422]                                                                    |                |
| Completeness to theta = 25.027°   | 97.4 %                                                                                    |                |
| Refinement method                 | Full-matrix least-squares on F <sup>2</sup>                                               |                |
| Data / restraints / parameters    | 9258 / 0 / 710                                                                            |                |
| Goodness-of-fit on F <sup>2</sup> | 1.161                                                                                     |                |
| Final R indices [I > 2σ(I)]       | R1 = 0.1153, wR2 = 0.3032                                                                 |                |
| R indices (all data)              | R1 = 0.1185, wR2 = 0.3048                                                                 |                |
| Largest diff. peak and hole       | 0.685 and -0.533 e/Å <sup>3</sup>                                                         |                |

**Table S2.** Hydrogen bonds for **1<sub>anti</sub>** [Å and °].

| D-H...A               | d(D-H) | d(H...A) | d(D...A)  | <(DHA) |
|-----------------------|--------|----------|-----------|--------|
| C(18)-H(18B)...O(9)#1 | 0.99   | 2.33     | 3.228(8)  | 151    |
| C(31)-H(31B)...O(2)#2 | 0.99   | 2.44     | 3.414(7)  | 167    |
| O(4)-H(1O4)...N(1B)   | 0.94   | 1.85     | 2.718(9)  | 152    |
| O(8)-H(1O8)...N(1D)   | 1.02   | 1.81     | 2.793(9)  | 161    |
| C(1A)-H(1A3)...O(3)#3 | 0.98   | 2.45     | 3.291(9)  | 144    |
| C(1D)-H(1D1)...O(2)#4 | 0.98   | 2.61     | 3.235(9)  | 122    |
| C(1D)-H(1D1)...O(6)#5 | 0.98   | 2.42     | 3.255(9)  | 142    |
| C(1E)-H(1E2)...N(1F)  | 0.98   | 2.35     | 3.277(15) | 158    |
| C(1F)-H(1F1)...O(9)#6 | 0.98   | 2.62     | 3.325(13) | 129    |

Symmetry transformations used to generate equivalent atoms:

#1 x,y-1,z   #2 x,y+1,z   #3 -x,-y-1,-z+1   #4 -x+2,-y+1,-z+1

#5 -x+2,-y+2,-z+1   #6 -x+1,-y+2,-z
